# Supplementary material for: Equilibrium and kinetic approaches to understand the occurrence of the uncommon chloritoid + biotite assemblage
Source: Copernicus journal article supplement (doi:10.5194/ejm-35-305-2023), 2023-05-02
Supplement: Supplementary file 1 [file ejm-35-305-2023-supplement.zip]

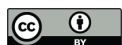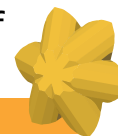

*Supplement of*

**Equilibrium and kinetic approaches to understand the occurrence of the uncommon chloritoid + biotite assemblage**

**Sara Nerone et al.**

*Correspondence to:* Sara Nerone ([sara.nerone@unito.it](mailto:sara.nerone@unito.it))

- [ejm-35-305-2023-supplement-title-page.pdf](#)
- Supplementary material
  - [Figure S1.png](#)
  - [Figure S2.png](#)
  - [Figure S3.png](#)
  - [Figure S4.png](#)
  - [Figure S5.png](#)
  - [Table S1.xlsx](#)
  - [Table S2.xlsx](#)
  - [Table S3.xlsx](#)

The copyright of individual parts of the supplement might differ from the article licence.
