# Supplementary material for: Equilibrium and kinetic approaches to understand the occurrence of the uncommon chloritoid + biotite assemblage
Source: Copernicus journal article supplement (doi:10.5194/ejm-35-305-2023), 2023-05-02
Supplement: Supplementary file 2 [file ejm-35-305-2023-supplement.zip]

Archive with 10 entries (9 files):
- Supplementary material/
- Supplementary material/Figure S2.png
- Supplementary material/Figure S5.png
- Supplementary material/Table S1.xlsx
- Supplementary material/Table S2.xlsx
- Supplementary material/Table S3.xlsx
- Supplementary material/Figure S4.png
- Supplementary material/Figure S1.png
- Supplementary material/Figure S3.png
- ejm-35-305-2023-supplement-title-page.pdf
