# Supplementary material for: Equilibrium and kinetic approaches to understand the occurrence of the uncommon chloritoid + biotite assemblage
Source: Copernicus journal article supplement (doi:10.5194/ejm-35-305-2023), 2023-05-02
Supplement: Supplementary file 2 [file ejm-35-305-2023-supplement.zip › Supplementary material/Table S1.xlsx]

## Sheet: 19a-2a
phases	phase components (PC)	structural formulas of PC	molar volume (V/mol) of PC	average proportion (X) of PC in a given phase	molar volume (V/mol) of each phase	mode % of phases (V)	n° of moles (mol) of phases	mol % of phases	mol % of PC	moles of oxides in each phase or PC:
			from hp62ver.dat in: m3 *105	calculated from microprobe analysis	Σ(molar volume of each PC)*(X of the PC )	V	mode (V) / molar volume (V/mol) of phase	n° moles * (100/Sum moles)	mol % of a phase)*(X of the PC)	=proportion of a given PC from column J multiplied by the number of moles of the oxide in the structural formula; for biotite, white mica and hornblende (*) :because the defined PC are artificial (they don't take into account Ti, Al, Si substitutions), there is only one line, with all PC lumped together, and with total oxide proportions from microprobe analyses
										SiO2	Al2O3	MgO	FeO	MnO	CaO	Na2O	K2O	TiO2	Fe2O3	Sum
Pl	ab	NaAlSi3O8	10.067	0.68	10.0708	0	0	0	0	0	0					0				0
	an	CaAl2Si2O8	10.079	0.32					0	0	0				0					0
Kfs	ab	NaAlSi3O8	10.067	0.13	10.7665	0	0	0	0	0	0					0				0
	san	KAlSi3O8	10.871	0.87					0	0	0						0			0
	an	CaAl2Si2O8	10.079	0					0	0	0				0					0
Grt	alm	Fe3Al2Si3O12	11.525	0.83	11.4714	0.97	0.0845583	0.418126	0.347045	1.04113	0.347045		1.04113							2.42931
	gr	Ca3Al2Si3O12	12.535	0.02					0.00836252	0.0250876	0.00836252				0.0250876					0.0585377
	py	Mg3Al2Si3O12	11.313	0.08					0.0334501	0.10035	0.0334501	0.10035								0.234151
	andr	Ca3Fe2Si3O12	13.204	0.03					0.0125438	0.0376314					0.0376314				0.0125438
	sps	Mn3Al2Si3O12	11.792	0.03					0.0125438	0.0376314	0.0125438			0.0376314						0.0878065
Bt*	ann*	K(Fe,Al,Ti)3(AlSi)4O10(OH)2	15.432	0.5	15.198	12.85	0.845506	4.18088	4.18088	11.8737	3.7837	4.01364	5.30972			0	1.58873	0.376279	0.0418088	26.9876
	phl*	K(Mg,Al,Ti)3(AlSi)4O10(OH)2	14.964	0.5
Wm	mu*	KAl3Si3O10(OH)2	14.083	0.5	13.647	44.16	3.23588	16.0008	16.0008	49.2826	22.1612	0.96005				1.04005	6.32033	0.320017	0.640034	80.7242
	pa*	NaAl3Si3O10(OH)2	13.211	0.5
Qtz	q	SiO2	2.269	1	2.269	35.34	15.5751	77.0164	77.0164	77.0164										77.0164
Alsil	ky	Al2SiO5	4.414	1	4.414	0	0	0	0	0	0									0
Alsil	sill	Al2SiO5	4.986	1	4.986	0	0	0	0	0	0									0
St	mst	Mg4Al18Si7.5O48H4	44.26	0.13	44.7994	2.45	0.0546882	0.270424	0.0351551	0.263663	0.316396	0.14062								0.720679
	fst	Fe4Al18Si7.5O48H4	44.88	0.87					0.235269	1.76451	2.11742		0.941075							4.82301
	mnst	Mn4Al18Si7:5O48H4	45.46	0					0	0	0			0						0
Ctd	mctd	MgAl2SiO5(OH)2	6.875	0.14	6.8955	1.74	0.252338	1.24777	0.174688	0.174688	0.174688	0.174688								0.524063
	fctd	FeAl2SiO5(OH)2	6.98	0.85					1.0606	1.0606	1.0606		1.0606							3.18181
	octd	Mg(Al0.75Fe0.25)2SiO5(OH)2	6.875	0.01					0.0124777	0.0124777	0.00935827	0.0124777							0.00311942
	mnctd	MnAl2SiO5(OH)2	7.175	0					0	0	0			0						0
Chl	daph	Fe5Al2Si3O10(OH)8	21.62	0.61	21.4328	1.79	0.0835169	0.412976	0.251915	0.755746	0.251915		1.25958							2.26724
	clin	Mg5Al24Si3O10(OH)8	21.14	0.39					0.161061	0.483182	0.161061	0.805304								1.44955
Hbl	tr	Ca2Mg5Si8O22(OH)2	27.27	0.5	27.845	0	0	0	0	0	0	0	0		0	0	0	0		0
	ftr	Ca2Fe5Si8O22(OH)2	28.42	0.5
Ru	ru	TiO2	1.882	1	1.882	0	0	0	0									0		0
Ilm	ilm	FeTiO3	3.169	0.99	3.16817	0.29	0.0915355	0.452627	0.448101				0.448101					0.448101		0.896201
	geik	MgTiO3	3.086	0.01					0.00452627			0.00452627						0.00452627		0.00905254
					SUM	99.59	20.2232	99.5474	99.5432	143.929	30.4377	6.21166	10.0602	0.0376314	0.0627189	1.04005	7.90907	1.14892	0.697506	201.41
										SiO2	Al2O3	MgO	FeO	MnO	CaO	Na2O	K2O	TiO2	Fe2O3
								mol % of oxides (bulk composition)		71.461	15.1123	3.08409	4.9949	0.018684	0.03114	0.516388	3.92686	0.570441	0.346312	100.062

## Sheet: 19a-4
phases	phase components (PC)	structural formulas of PC	molar volume (V/mol) of PC	average proportion (X) of PC in a given phase	molar volume (V/mol) of each phase	mode % of phases (V)	n° of moles (mol) of phases	mol % of phases	mol % of PC	moles of oxides in each phase or PC:
			from hp62ver.dat in: m3 *105	calculated from microprobe analysis	Σ(molar volume of each PC)*(X of the PC )	V	mode (V) / molar volume (V/mol) of phase	n° moles * (100/Sum moles)	mol % of a phase)*(X of the PC)	=proportion of a given PC from column J multiplied by the number of moles of the oxide in the structural formula; for biotite, white mica and hornblende (*) :because the defined PC are artificial (they don't take into account Ti, Al, Si substitutions), there is only one line, with all PC lumped together, and with total oxide proportions from microprobe analyses
										SiO2	Al2O3	MgO	FeO	MnO	CaO	Na2O	K2O	TiO2	Fe2O3	Sum
Pl	ab	NaAlSi3O8	10.067	0.68	10.0708	0	0	0	0	0	0					0				0
	an	CaAl2Si2O8	10.079	0.32					0	0	0				0					0
Kfs	ab	NaAlSi3O8	10.067	0.13	10.7665	0	0	0	0	0	0					0				0
	san	KAlSi3O8	10.871	0.87					0	0	0						0			0
	an	CaAl2Si2O8	10.079	0					0	0	0				0					0
GrtC	alm	Fe3Al2Si3O12	11.525	0.84	11.0699	1.9	0.171636	0.926674	0.778406	2.33522	0.778406		2.33522							5.44884
	gr	Ca3Al2Si3O12	12.535	0.01					0.00926674	0.0278002	0.00926674				0.0278002					0.0648672
	py	Mg3Al2Si3O12	11.313	0.07					0.0648672	0.194602	0.0648672	0.194602								0.45407
	andr	Ca3Fe2Si3O12	13.204	0.04					0.037067	0.111201					0.111201				0.037067	0.259469
	sps	Mn3Al2Si3O12	11.792	0.04					0.037067	0.111201	0.037067			0.111201						0.259469
GrtR	alm	Fe3Al2Si3O12	11.525	0.89	11.344	0.81	0.0714036	0.385513	0.343107	1.02932	0.343107		1.02932							2.40175
	gr	Ca3Al2Si3O12	12.535	0					0	0	0				0					0
	py	Mg3Al2Si3O12	11.313	0.07					0.0269859	0.0809577	0.0269859	0.0809577								0.188901
	andr	Ca3Fe2Si3O12	13.204	0.015					0.00578269	0.0173481					0.0173481				0.00578269	0.0404789
	sps	Mn3Al2Si3O12	11.792	0.025					0.00963782	0.0289135	0.00963782			0.0289135						0.0674648
Bt*	ann*	K(Fe,Al,Ti)3(AlSi)4O10(OH)2	15.432	0.5	15.198	9.68	0.636926	3.43881	3.43881	9.31916	3.07773	2.85421	5.12382			0.0859701	1.34113	0.309492	0.17194	22.2835
	phl*	K(Mg,Al,Ti)3(AlSi)4O10(OH)2	14.964	0.5
Wm	mu*	KAl3Si3O10(OH)2	14.083	0.5	13.647	50	3.66381	19.7811	19.7811	60.7281	27.4958	0.989057				1.58249	7.51684	0.197811	0.890152	99.4003
	pa*	NaAl3Si3O10(OH)2	13.211	0.5
Qtz	q	SiO2	2.269	1	2.269	29.86	13.16	71.0516	71.0516	71.0516										71.0516
Alsil	ky	Al2SiO5	4.414	1	4.414	0	0	0	0	0	0									0
Alsil	sill	Al2SiO5	4.986	1	4.986	0	0	0	0	0	0									0
St	mst	Mg4Al18Si7.5O48H4	44.26	0.115	44.8087	1.74	0.0388317	0.209655	0.0241103	0.180828	0.216993	0.0964414								0.494262
	fst	Fe4Al18Si7.5O48H4	44.88	0.885					0.185545	1.39159	1.6699		0.742179							3.80367
	mnst	Mn4Al18Si7:5O48H4	45.46	0					0	0	0			0						0
Ctd	mctd	MgAl2SiO5(OH)2	6.875	0.1	6.8299	4.09	0.598837	3.23316	0.323316	0.323316	0.323316	0.323316								0.969949
	fctd	FeAl2SiO5(OH)2	6.98	0.88					2.84518	2.84518	2.84518		2.84518							8.53555
	octd	Mg(Al0.75Fe0.25)2SiO5(OH)2	6.875	0.02					0.0646633	0.0646633	0.0484974	0.0646633							0.0161658	0.19399
	mnctd	MnAl2SiO5(OH)2	7.175	0					0	0	0			0						0
Chl	daph	Fe5Al2Si3O10(OH)8	21.62	0.66	21.4568	0.28	0.0130495	0.070455	0.0465003	0.139501	0.0465003		0.232501							0.418503
	clin	Mg5Al24Si3O10(OH)8	21.14	0.34					0.0239547	0.0718641	0.0239547	0.119773								0.215592
Hbl	tr	Ca2Mg5Si8O22(OH)2	27.27	0.5	27.845	0	0	0	0	0	0	0	0		0	0	0	0		0
	ftr	Ca2Fe5Si8O22(OH)2	28.42	0.5
Ru	ru	TiO2	1.882	1	1.882	0	0	0	0									0		0
Ilm	ilm	FeTiO3	3.169	1	3.169	0.53	0.167245	0.902968	0.902968				0.902968					0.902968		1.80594
	geik	MgTiO3	3.086	0					0			0						0		0
					SUM	98.89	18.5217	99.097	99.097	150.052	37.0172	4.72302	13.2112	0.140114	0.156349	1.66846	8.85797	1.41027	1.12111	218.358
										SiO2	Al2O3	MgO	FeO	MnO	CaO	Na2O	K2O	TiO2	Fe2O3
								mol % of oxides (bulk composition)		68.7185	16.9525	2.16297	6.05024	0.0641672	0.0716022	0.764094	4.05663	0.645853	0.513426	100
