# Supplementary material for: Equilibrium and kinetic approaches to understand the occurrence of the uncommon chloritoid + biotite assemblage
Source: Copernicus journal article supplement (doi:10.5194/ejm-35-305-2023), 2023-05-02
Supplement: Supplementary file 2 [file ejm-35-305-2023-supplement.zip › Supplementary material/Table S2.xlsx]

## Sheet: 2a-Wm
Table S1a: Representative analysis of muscovite in sample 19a-2a
N° analysis	2.14 Mu	2.19 Mu	2.20 Mu	2.23 Mu	2.24 Mu	11.4 Mu	11.22 Mu	11.31 Mu	11.36 Mu	11.40 Mu	5.4 Mu	5.7 Mu	5.8 Mu	5.11 Mu	5.14 Mu	5.15 Mu
Position	Sp-1	Sp-1	Sp-1	Sp	Sp	Sp-1	Sp	Sp	Sp	Sp-1	Sp	Sp-1	Sp	Sp	Sp-1	Sp-1
SiO2	46.9596	46.9889	47.1941	47.1041	46.8436	46.6427	46.6313	46.7069	47.0007	46.1031	46.5928	46.7542	47.017	46.6276	47.1609	46.8016
TiO2	0.369446	0.281974	0.37676	0.369686	0.414637	0.32832	0	0.301738	0.384655	0.424913	0.564381	0.291758	0.324471	0.377042	0.325973	0.3861
Al2O3	35.0874	35.7301	35.7129	35.5412	35.9179	34.982	36.4456	35.9692	35.6274	35.2343	36.0472	35.9904	35.9535	36.0704	35.4784	36.043
FeO	1.73401	1.39546	1.06163	1.16425	1.09129	2.22996	1.20292	1.28262	1.25349	2.22359	1.16613	1.46263	1.22435	1.3759	1.23001	1.23003
MnO	0	0	0	0	0	0	0	0	0	0	0	0	0	0	0	0
MgO	0.678982	0.644512	0.614713	0.677757	0.518296	0.730777	0.392573	0.541047	0.592577	0.63737	0.512124	0.531416	0.491941	0.502723	0.704522	0.448711
CaO	0	0	0	0	0	0	0	0	0	0	0	0	0	0	0	0
Na2O	0.629056	0.966767	1.03113	1.00637	1.07806	0.995552	1.12467	1.04047	1.08119	1.00637	0.992893	1.00031	1.01528	1.04734	0.946372	1.04351
K2O	9.79531	9.26485	9.32976	9.44753	9.46408	9.28829	9.51724	9.45791	9.35648	9.58291	9.42726	9.24247	9.2736	9.2899	9.45321	9.34989
Total	95.2537	95.2726	95.321	95.3109	95.3278	95.1976	95.3143	95.2999	95.2965	95.2125	95.3028	95.2732	95.3001	95.2909	95.2994	95.3029
O	11	11	11	11	11	11	11	11	11	11	11	11	11	11	11	11
Si	3.0944	3.0832	3.0991	3.0972	3.0828	3.0728	3.0688	3.0727	3.0917	3.0478	3.0638	3.0691	3.0867	3.0636	3.0993	3.0767
Ti	0.0183	0.0139	0.0186	0.0183	0.0205	0.0163	0	0.0149	0.019	0.0211	0.0279	0.0144	0.016	0.0186	0.0161	0.0191
Al	2.7249	2.7631	2.7639	2.7542	2.7859	2.7161	2.8267	2.7889	2.762	2.7452	2.7937	2.7844	2.7819	2.7932	2.7479	2.7925
Fe3+	0.0957	0.0768	0.0583	0.0638	0.0599	0.1231	0.066	0.0704	0.0692	0.123	0.0644	0.0801	0.0672	0.0754	0.0676	0.0677
Fe2+	0	0	0	0	0	0	0	0	0	0	0	0	0	0	0	0
Mn	0	0	0	0	0	0	0	0	0	0	0	0	0	0	0	0
Mg	0.0667	0.063	0.0602	0.0664	0.0508	0.0718	0.0385	0.0531	0.0581	0.0628	0.0502	0.052	0.0481	0.0492	0.069	0.044
Ca	0	0	0	0	0	0	0	0	0	0	0	0	0	0	0	0
Na	0.0804	0.123	0.1313	0.1283	0.1376	0.1272	0.1435	0.1327	0.1379	0.129	0.1266	0.1273	0.1292	0.1334	0.1206	0.133
K	0.8234	0.7755	0.7815	0.7924	0.7945	0.7806	0.799	0.7937	0.7851	0.8081	0.7908	0.7739	0.7766	0.7786	0.7925	0.7841
XMg (Fe2+)	1	1	1	1	1	1	1	1	1	1	1	1	1	1	1	1
XMg (Fetot)	0.411	0.451	0.508	0.51	0.459	0.368	0.369	0.43	0.456	0.338	0.438	0.394	0.417	0.395	0.505	0.394
AlIV	0.906	0.917	0.901	0.903	0.917	0.927	0.931	0.927	0.908	0.952	0.936	0.931	0.913	0.936	0.901	0.923
AlVI	1.819	1.846	1.863	1.851	1.869	1.789	1.896	1.862	1.854	1.793	1.858	1.854	1.869	1.857	1.847	1.869

## Sheet: 2a-Bt
Table S1b: Representative analysis of biotite in sample 19a-2a
N° analysis	2.15 Bt	2.22 Bt	2.25 Bt	2.26 Bt	2.32 Bt	2.37 Bt	2.40 Bt	2.41 Bt	2.45 Bt	11.2 Bt	11.7 Bt	11.17 Bt	11.30 Bt	5.3 Bt	5.6 Bt	5.9 Bt	5.10 Bt	5.12 Bt	5.13 Bt	5.16 Bt	5.19 Bt
Position	Sp-1	Sp-1	Sp	Sp	Sp-1	Sp	Sp	Sp	Sp	Sp-1	Sp-1	Sp	Sp-1	Sp	Sp-1	Sp-1	Sp-1	Sp-1	Sp-1	Sp	Sp-1
SiO2	36.7553	38.2253	38.4171	37.516	37.8903	37.7313	37.2162	37.518	37.658	37.0189	35.0452	37.2724	38.2341	38.002	38.1285	37.5377	37.719	37.9341	38.1382	37.8159	37.1184
TiO2	1.49454	1.70648	1.93852	1.88378	1.66667	0.897308	1.73303	1.57341	1.96057	1.61992	1.33973	0.916065	1.92591	1.64132	1.42903	1.4972	1.84131	1.75824	1.71627	1.68492	2.02425
Al2O3	19.3568	20.0434	20.9061	19.4232	20.4747	20.7267	20.5879	20.7091	20.7414	19.4716	19.0689	21.1039	20.3431	19.3566	20.2392	19.9698	20.433	20.4066	20.1608	20.3243	20.5239
FeO	19.1198	19.3608	18.8819	20.5619	19.23	20.8264	21.0815	21.1191	19.8522	21.6569	24.372	20.4741	17.9857	20.0897	19.6782	20.3684	20.7231	19.8132	19.3678	19.7978	20.6105
MnO	0	0	0	0	0	0	0	0	0	0	0	0	0	0	0	0	0	0	0	0	0
MgO	10.5751	8.54277	8.24676	8.3014	8.32278	8.7626	8.14961	8.39889	8.50654	8.19743	8.08306	7.40868	9.14544	8.03151	8.44713	8.03533	8.15757	8.35165	8.25549	8.48778	8.75731
CaO	0	0	0	0	0	0	0	0	0	0	0	0	0	0	0	0	0	0	0	0	0
Na2O	0	0	0	0	0	0	0	0	0	0	0	0	0	0	0	0	0	0	0	0	0
K2O	8.74047	8.18078	7.647	8.39719	8.48101	7.05661	7.27213	6.68144	7.30662	8.11046	8.19471	8.93164	8.40876	8.98348	8.12956	8.6816	7.15322	7.78022	8.42929	7.94019	6.98203
Total	96.0421	96.0596	96.0373	96.0834	96.0654	96.0009	96.0404	96	96.0253	96.0752	96.1036	96.1067	96.0429	96.1046	96.0517	96.09	96.0272	96.044	96.0678	96.051	96.0165
O	11	11	11	11	11	11	11	11	11	11	11	11	11	11	11	11	11	11	11	11	11
Si	2.7832	2.9067	2.9042	2.8734	2.8905	2.8305	2.8145	2.8152	2.8388	2.8316	2.6971	2.8672	2.8987	2.929	2.8978	2.8809	2.849	2.8761	2.9116	2.8697	2.7903
Ti	0.0851	0.0976	0.1102	0.1085	0.0956	0.0506	0.0986	0.0888	0.1111	0.0932	0.0775	0.053	0.1098	0.0951	0.0817	0.0864	0.1046	0.1002	0.0985	0.0962	0.1144
Al	1.7275	1.7963	1.8626	1.7533	1.8408	1.8325	1.835	1.8314	1.8428	1.7553	1.7296	1.9133	1.8177	1.7583	1.8129	1.8063	1.819	1.8235	1.814	1.8177	1.8183
Fe3+	0	0	0	0	0	0	0	0	0	0	0	0	0	0	0	0	0	0	0	0	0
Fe2+	1.2108	1.2312	1.1937	1.3171	1.2268	1.3066	1.3333	1.3253	1.2515	1.3853	1.5686	1.3171	1.1403	1.2949	1.2507	1.3073	1.309	1.2563	1.2365	1.2564	1.2957
Mn	0	0	0	0	0	0	0	0	0	0	0	0	0	0	0	0	0	0	0	0	0
Mg	1.1935	0.9682	0.9292	0.9477	0.9463	0.9798	0.9186	0.9393	0.9558	0.9346	0.9272	0.8494	1.0335	0.9227	0.9569	0.9192	0.9184	0.9438	0.9394	0.96	0.9812
Ca	0	0	0	0	0	0	0	0	0	0	0	0	0	0	0	0	0	0	0	0	0
Na	0	0	0	0	0	0	0	0	0	0	0	0	0	0	0	0	0	0	0	0	0
K	0.8443	0.7935	0.7374	0.8204	0.8253	0.6753	0.7015	0.6395	0.7026	0.7914	0.8045	0.8764	0.8132	0.8832	0.7882	0.8499	0.6892	0.7525	0.8209	0.7686	0.6695
XMg (Fe2+)	0.496	0.44	0.438	0.418	0.435	0.429	0.408	0.415	0.433	0.403	0.372	0.392	0.475	0.416	0.433	0.413	0.412	0.429	0.432	0.433	0.431
XMg (Fetot)	0.496	0.44	0.438	0.418	0.435	0.429	0.408	0.415	0.433	0.403	0.372	0.392	0.475	0.416	0.433	0.413	0.412	0.429	0.432	0.433	0.431
AlIV	1.217	1.093	1.096	1.127	1.11	1.169	1.185	1.185	1.161	1.168	1.303	1.133	1.101	1.071	1.102	1.119	1.151	1.124	1.088	1.13	1.21
AlVI	0.511	0.703	0.767	0.627	0.731	0.663	0.65	0.647	0.682	0.587	0.427	0.78	0.716	0.687	0.711	0.687	0.668	0.7	0.726	0.687	0.609

## Sheet: 2a-Chl
Table S1c: Representative analysis of chlorite in sample 19a-2a
N° analysis	2.21 Chl	2.29 Chl	11.12 Chl	5.5 Chl	5.18 Chl
Position	post-Sp
SiO2	24.2527	23.7443	22.6556	24.3011	23.9979
TiO2	0	0	0	0	0
Al2O3	23.0958	23.2877	24.9474	23.6695	23.3421
FeO	30.2621	30.3342	31.7178	29.3332	29.8361
MnO	0	0	0	0	0
MgO	11.1794	11.4155	9.54584	11.4516	11.5812
CaO	0	0	0	0	0
Na2O	0	0	0	0	0
K2O	0	0	0	0	0
Total	88.7899	88.7817	88.8667	88.7554	88.7573
O	28	28	28	28	28
Si	5.1908	5.075	4.882	5.1816	5.1211
Ti	0	0	0	0	0
Al	5.826	5.8662	6.336	5.9482	5.8707
Fe3+	0	0	0	0	0
Fe2+	5.4167	5.4221	5.716	5.2307	5.3246
Mn	0	0	0	0	0
Mg	3.5664	3.6367	3.066	3.6395	3.6836
Ca	0	0	0	0	0
Na	0	0	0	0	0
K	0	0	0	0	0
XMg (Fe2+)	0.397	0.401	0.349	0.41	0.409
XMg (Fetot)	0.397	0.401	0.349	0.41	0.409

## Sheet: 2a-Grt
Table S1d: Representative analysis of garnet in sample 19a-2a
N° analysis	2.1 Grt	2.2 Grt	2.3 Grt	2.4 Grt	2.5 Grt	2.6 Grt	2.7 Grt	2.8 Grt	2.9 Grt	2.10 Grt	2.11 Grt	2.12 Grt	2.13 Grt
Position	rim	mantle	mantle	mantle	core	core	core	core	core	mantle	mantle	mantle	rim
SiO2	36.37	36.52	36.31	36.42	36.24	36.52	36.3	36.5	36.65	36.62	36.63	36.9	36.74
TiO2	0	0	0	0	0	0	0	0	0	0	0	0	0
Al2O3	20.61	20.51	20.44	20.32	20.43	20.61	20.59	20.55	20.68	20.6	20.48	20.78	20.53
FeO	37.89	37.36	37.02	37.07	36.58	36.71	36.84	36.96	37.42	37.76	38.14	37.59	38.4
MnO	1.29	1.05	1.16	1.13	1.44	1.37	1.51	1.42	1.34	1.16	1.08	1.17	1.51
MgO	1.97	2.05	2.14	2.18	2	1.99	2.04	2.04	2.09	2.16	2.25	2.13	1.81
CaO	1.63	1.79	1.8	1.73	2.03	1.91	1.99	1.92	1.77	1.7	1.7	1.79	1.58
Na2O	0	0	0	0	0	0	0	0	0	0	0	0	0
K2O	0	0	0	0	0	0	0	0	0	0	0	0	0
Total	99.76	99.28	98.87	98.85	98.72	99.11	99.27	99.39	99.95	100	100.28	100.36	100.57
O	12	12	12	12	12	12	12	12	12	12	12	12	12
Si	2.965	2.9874	2.9805	2.9902	2.9801	2.9909	2.9685	2.9817	2.9775	2.9742	2.9674	2.9845	2.9773
Ti	0	0	0	0	0	0	0	0	0	0	0	0	0
Al	1.9802	1.9773	1.9774	1.9663	1.98	1.9893	1.9845	1.9785	1.9801	1.9719	1.9554	1.9808	1.9608
Fe3+	0.0897	0.048	0.0616	0.0533	0.0598	0.0289	0.0786	0.058	0.0649	0.0797	0.1098	0.0501	0.0845
Fe2+	2.4942	2.5078	2.4797	2.4927	2.4558	2.4853	2.4409	2.467	2.4782	2.485	2.4741	2.4925	2.5179
Mn	0.0891	0.0727	0.0807	0.0786	0.1003	0.095	0.1046	0.0983	0.0922	0.0798	0.0741	0.0802	0.1036
Mg	0.2394	0.2499	0.2618	0.2668	0.2451	0.2429	0.2487	0.2484	0.2531	0.2615	0.2717	0.2568	0.2186
Ca	0.1424	0.1569	0.1583	0.1522	0.1789	0.1676	0.1744	0.168	0.1541	0.1479	0.1476	0.1551	0.1372
Na	0	0	0	0	0	0	0	0	0	0	0	0	0
K	0	0	0	0	0	0	0	0	0	0	0	0	0
Grossular	0.003	0.028	0.022	0.024	0.03	0.042	0.019	0.027	0.019	0.01	0	0.027	0.003
Almandine	0.841	0.839	0.832	0.834	0.824	0.831	0.822	0.827	0.832	0.836	0.834	0.835	0.846
Pyrope	0.081	0.084	0.088	0.089	0.082	0.081	0.084	0.083	0.085	0.088	0.092	0.086	0.073
Spessartine	0.03	0.024	0.027	0.026	0.034	0.032	0.035	0.033	0.031	0.027	0.025	0.027	0.035
Andradite	0.045	0.024	0.031	0.027	0.03	0.014	0.04	0.029	0.033	0.04	0.05	0.025	0.043
AlIV	0.035	0.013	0.019	0.01	0.02	0.009	0.032	0.018	0.022	0.026	0.033	0.015	0.023
AlVI	1.945	1.965	1.958	1.956	1.96	1.98	1.953	1.96	1.958	1.946	1.923	1.965	1.938
XMg(Fe2+)	0.088	0.091	0.096	0.097	0.091	0.089	0.092	0.091	0.093	0.095	0.099	0.093	0.08
XMg(Fetot)	0.085	0.089	0.093	0.095	0.089	0.088	0.09	0.09	0.091	0.093	0.095	0.092	0.077
XMg	0.081	0.084	0.088	0.089	0.082	0.081	0.084	0.083	0.085	0.088	0.092	0.086	0.073
XFe2+	0.841	0.839	0.832	0.834	0.824	0.831	0.822	0.827	0.832	0.836	0.834	0.835	0.846
XCa	0.048	0.053	0.053	0.051	0.06	0.056	0.059	0.056	0.052	0.05	0.05	0.052	0.046
XMn	0.03	0.024	0.027	0.026	0.034	0.032	0.035	0.033	0.031	0.027	0.025	0.027	0.035

## Sheet: 2a-Cld
Table S1e: Representative analysis of chloritoid in sample 19a-2a
N° analysis	2.27 Cld	2.28 Cld	2.42 Cld	2.43 Cld	2.46 Cld	11.1 Cld	11.5 Cld	11.6 Cld	11.10 Cld	11.11 Cld	11.13 Cld	11.14 Cld	11.24 Cld	11.25 Cld	11.28 Cld	11.29 Cld	11.32 Cld	11.33 Cld	5.17 Cld
SiO2	24.4987	24.4224	24.6645	24.6196	24.5365	24.326	24.5136	24.3499	24.3552	24.7452	24.5452	24.4433	24.7251	24.4325	24.5764	24.5519	24.7158	24.5764	24.2259
TiO2	0	0	0	0	0	0	0	0	0	0	0	0	0	0	0	0	0	0	0
Al2O3	40.6819	40.6972	41.0024	40.9617	40.6318	40.4811	40.7844	40.545	40.705	40.8316	40.8367	40.7147	40.4994	40.707	40.5475	40.3769	40.8952	41.2582	40.6949
FeO	24.919	25.167	24.4815	24.6805	25.2356	25.5774	24.9826	25.4929	25.0621	24.614	24.9049	25.0916	24.9409	25.0751	25.0764	25.1582	24.5534	24.6068	25.3846
MnO	0	0	0	0	0	0	0	0	0	0	0	0	0	0	0	0.276554	0	0	0
MgO	2.59542	2.41337	2.56202	2.45486	2.3304	2.30195	2.43703	2.29873	2.54856	2.52296	2.43602	2.44433	2.55883	2.47745	2.5	2.34559	2.54771	2.27296	2.36171
CaO	0	0	0	0	0	0	0	0	0	0	0	0	0	0	0	0	0	0	0
Na2O	0	0	0	0	0	0	0	0	0	0	0	0	0	0	0	0	0	0	0
K2O	0	0	0	0	0	0	0	0	0	0	0	0	0	0	0	0	0	0	0
Total	92.6951	92.7	92.7105	92.7166	92.7343	92.6865	92.7176	92.6866	92.6707	92.7137	92.7228	92.6939	92.7243	92.692	92.7004	92.7092	92.7121	92.7144	92.667
O	14	14	14	14	14	14	14	14	14	14	14	14	14	14	14	14	14	14	14
Si	2.0174	2.0136	2.0283	2.0264	2.0237	2.0094	2.0195	2.0107	2.0068	2.0364	2.0216	2.0147	2.0365	2.0136	2.0255	2.0268	2.0333	2.0234	1.9994
Ti	0	0	0	0	0	0	0	0	0	0	0	0	0	0	0	0	0	0	0
Al	3.9482	3.9546	3.974	3.9736	3.9496	3.9409	3.9599	3.9459	3.953	3.9602	3.964	3.9551	3.9314	3.9539	3.9386	3.9285	3.9651	4.0034	3.9583
Fe3+	0.017	0.0181	0	0	0.003	0.0404	0.0011	0.0328	0.0333	0	0	0.0154	0	0.019	0.0104	0.0179	0	0	0.0429
Fe2+	1.6988	1.717	1.6837	1.6989	1.7372	1.7259	1.7203	1.7278	1.6938	1.694	1.7154	1.7144	1.718	1.7092	1.7184	1.7189	1.6892	1.6942	1.7089
Mn	0	0	0	0	0	0	0	0	0	0	0	0	0	0	0	0.0193	0	0	0
Mg	0.3186	0.2966	0.314	0.3012	0.2865	0.2834	0.2992	0.2829	0.313	0.3095	0.299	0.3003	0.3141	0.3043	0.3071	0.2886	0.3124	0.2789	0.2905
Ca	0	0	0	0	0	0	0	0	0	0	0	0	0	0	0	0	0	0	0
Na	0	0	0	0	0	0	0	0	0	0	0	0	0	0	0	0	0	0	0
K	0	0	0	0	0	0	0	0	0	0	0	0	0	0	0	0	0	0	0
XMg (Fe2+)	0.158	0.147	0.157	0.151	0.142	0.141	0.148	0.141	0.156	0.154	0.148	0.149	0.155	0.151	0.152	0.144	0.156	0.141	0.145
XMg (Fetot)	0.157	0.146	0.157	0.151	0.141	0.138	0.148	0.138	0.153	0.154	0.148	0.148	0.155	0.15	0.151	0.143	0.156	0.141	0.142

## Sheet: 2a-St
Table S1f: Representative analysis of staurolite in sample 19a-2a
N° analysis	2.30 St	2.31 St	2.33 St	2.34 St	2.35 St	2.36 St	2.38 St	2.39 St	2.44 St	11.16 St	11.20 St	11.21 St	11.26 St	11.27 St	11.34 St	11.35 St
SiO2	27.7032	27.8237	27.7158	27.7008	27.4147	27.6226	27.9747	27.7245	27.3658	27.3548	27.4192	27.6988	27.588	27.5866	27.6742	27.1561
TiO2	0	0	0	0.341365	0.520727	0.538235	0.509372	0.616099	0.374873	0.50277	0.588661	0.556242	0.375139	0.368777	0.364668	0.50308
Al2O3	53.3771	53.1496	53.5164	53.5241	53.0631	53.0517	52.7914	53.2673	53.2016	53.4065	53.3512	53.2138	53.3104	53.1141	53.7176	53.7064
FeO	15.5679	15.514	15.3628	15.0402	15.6831	15.426	15.3015	15.049	15.613	15.5961	15.3775	15.2246	15.2388	15.5091	14.9514	15.4517
MnO	0	0	0	0	0	0	0	0	0	0	0	0	0	0	0	0
MgO	1.2418	1.40312	1.29712	1.28514	1.21503	1.25927	1.31418	1.2322	1.33739	1.03632	1.15667	1.20519	1.37889	1.31121	1.18517	1.07803
CaO	0	0	0	0	0	0	0	0	0	0	0	0	0	0	0	0
Na2O	0	0	0	0	0	0	0	0	0	0	0	0	0	0	0	0
K2O	0	0	0	0	0	0	0	0	0	0	0	0	0	0	0	0
Total	97.89	97.8903	97.8922	97.8916	97.8967	97.8978	97.8912	97.8891	97.8926	97.8966	97.8932	97.8986	97.8911	97.8898	97.893	97.8953
O	24	24	24	24	24	24	24	24	24	24	24	24	24	24	24	24
Si	3.9395	3.9549	3.938	3.9373	3.9063	3.9337	3.9838	3.946	3.8946	3.898	3.905	3.9434	3.9225	3.9265	3.9337	3.8662
Ti	0	0	0	0.0365	0.0558	0.0576	0.0545	0.0659	0.0401	0.0539	0.063	0.0596	0.0401	0.0395	0.039	0.0539
Al	8.9459	8.9037	8.9618	8.9662	8.911	8.9042	8.8604	8.9354	8.9234	8.9694	8.955	8.9287	8.9332	8.9098	8.999	9.0115
Fe3+	0	0	0	0	0	0	0	0	0	0	0	0	0	0	0	0
Fe2+	1.8514	1.8441	1.8255	1.7878	1.8688	1.8372	1.8223	1.7913	1.8582	1.8586	1.8315	1.8126	1.812	1.8461	1.7773	1.8397
Mn	0	0	0	0	0	0	0	0	0	0	0	0	0	0	0	0
Mg	0.2632	0.2973	0.2747	0.2723	0.258	0.2673	0.2789	0.2614	0.2837	0.2201	0.2455	0.2557	0.2922	0.2782	0.2511	0.2288
Ca	0	0	0	0	0	0	0	0	0	0	0	0	0	0	0	0
Na	0	0	0	0	0	0	0	0	0	0	0	0	0	0	0	0
K	0	0	0	0	0	0	0	0	0	0	0	0	0	0	0	0
XMg (Fe2+)	0.124	0.139	0.131	0.132	0.121	0.127	0.133	0.127	0.132	0.106	0.118	0.124	0.139	0.131	0.124	0.111
XMg (Fetot)	0.124	0.139	0.131	0.132	0.121	0.127	0.133	0.127	0.132	0.106	0.118	0.124	0.139	0.131	0.124	0.111

## Sheet: 2a-Ilm
Table S1g: Representative analysis of ilmenite in sample 19a-2a
N° analysis	2.17 Ilm	2.18 Ilm	11.3 Ilm	11.9 Ilm	11.18 Ilm	11.19 Ilm	11.37 Ilm	11.38 Ilm	11.39 Ilm	11.42 Ilm	5.2 Ilm	5.20 Ilm	5.21 Ilm
SiO2	0	0	0	0	0	0	0	0	0	0	0	0	0
TiO2	51.25	50.72	50.51	50.09	49.91	49.24	50.63	50.53	51.06	50.19	49.41	49.03	49.65
Al2O3	0	0	0	0	0	0	0	0	0	0	0	0	0
FeO	47.44	47.61	45.79	45.62	44.45	44.02	45.17	44.24	45.06	45.34	45.22	44.72	45.27
MnO	0	0	0.35	0	0.36	0.36	0.27	0.51	0.39	0	0.35	0.25	0.34
MgO	0.31	0.48	0	0	0	0	0	0	0	0	0	0	0
CaO	0	0	0	0	0	0	0	0	0	0	0	0	0
Na2O	0	0	0	0	0	0	0	0	0	0	0	0	0
K2O	0	0	0	0	0	0	0	0	0	0	0	0	0
Total	99	98.81	96.65	95.71	94.72	93.62	96.07	95.28	96.51	95.53	94.98	94	95.26
O	3	3	3	3	3	3	3	3	3	3	3	3	3
Si	0	0	0	0	0	0	0	0	0	0	0	0	0
Ti	0.9797	0.9696	0.9921	0.9935	1.0007	0.9988	1.0009	1.0075	1.005	0.9977	0.9873	0.9901	0.9893
Al	0	0	0	0	0	0	0	0	0	0	0	0	0
Fe3+	0.0406	0.0607	0.0158	0.013	0	0.0024	0	0	0	0.0046	0.0254	0.0199	0.0215
Fe2+	0.968	0.9514	0.9843	0.9935	0.9911	0.9906	0.9931	0.981	0.9863	0.9977	0.9794	0.9844	0.9816
Mn	0	0	0.0077	0	0.0081	0.0082	0.006	0.0115	0.0086	0	0.0079	0.0057	0.0076
Mg	0.0117	0.0182	0	0	0	0	0	0	0	0	0	0	0
Ca	0	0	0	0	0	0	0	0	0	0	0	0	0
Na	0	0	0	0	0	0	0	0	0	0	0	0	0
K	0	0	0	0	0	0	0	0	0	0	0	0	0
Hematite	0.02	0.03	0.008	0.006	0	0.001	0	0	0	0.002	0.013	0.01	0.011
Corundum	0	0	0	0	0	0	0	0	0	0	0	0	0
Eskolaite	0	0	0	0	0	0	0	0	0	0	0	0	0
Ilmenite	0.968	0.951	0.984	0.994	0.993	0.991	0.995	0.996	0.996	0.998	0.979	0.984	0.982
Geikielite	0.012	0.018	0	0	0	0	0	0	0	0	0	0	0
Mn-Ilmenite	0	0	0.008	0	0.008	0.008	0.006	0.012	0.009	0	0.008	0.006	0.008
XMg (Fe2+)	0.012	0.019	0	0	0	0	0	0	0	0	0	0	0
XFe2+	0.988	0.981	0.992	1	0.992	0.992	0.994	0.988	0.991	1	0.992	0.994	0.992

## Sheet: 2a-Rt
Table S1h: Representative analysis of rutile in sample 19a-2a
N° analysis	11.41 Rt	11.43 Rt
Position	relict
SiO2	0	0.47
TiO2	89.97	88.57
Al2O3	0.43	0
FeO	3.31	4.71
MnO	0	0
MgO	0	0
CaO	0	0
Na2O	0	0
K2O	0	0
Total	93.71	93.75
O	2	2
Si	0	0.0066
Ti	0.9538	0.9379
Al	0.0071	0
Fe3+	0.039	0.0555
Fe2+	0	0
Mn	0	0
Mg	0	0
Ca	0	0
Na	0	0
K	0	0
XMg (Fetot)	0	0
