# Supplementary material for: Equilibrium and kinetic approaches to understand the occurrence of the uncommon chloritoid + biotite assemblage
Source: Copernicus journal article supplement (doi:10.5194/ejm-35-305-2023), 2023-05-02
Supplement: Supplementary file 2 [file ejm-35-305-2023-supplement.zip › Supplementary material/Table S3.xlsx]

## Sheet: 4-Wm
Table S2a: Representative analysis of muscovite in sample 19a-4
N° analysis	6.28 Wm	3.3 Wm	3.4 Wm	11.6 Wm	1.1 Wm	1.2 Wm	1.6 Wm	1.7 Wm	9.6 Wm	9.16 Wm	9.17 Wm	9.21 Wm	9.23 Wm	9.24 Wm	9.25 Wm	7.6 Wm	7.7 Wm	7.8 Wm	7.9 Wm
Position	Sp	Sp-1	Sp	post-Sp	Sp-1	Sp-1	Sp	Sp	Sp	Sp-1	Sp	Sp-1	Sp-1	Sp-1	Sp	Sp-1	Sp-1	Sp	Sp
SiO2	46.84	46.32	46.49	45.39	46.86	46.74	46.68	46.7	47.03	46.34	47.19	46.68	46.51	47.11	47.08	46.45	46.44	46.77	46.93
TiO2	0.28	0.27	0.3	0.28	0.27	0	0.32	0.3	0	0	0	0.29	0.27	0	0	0	0.31	0.34	0.31
Al2O3	36.08	35.88	36.68	30.79	36.06	36.9	36.31	36.29	36.19	35.09	35.9	36.06	36.58	36.19	35.95	36.77	36.47	35.91	35.79
FeO	1.36	1.82	1.13	6.97	1.27	0.97	1.11	1.2	1.23	2.78	1.38	1.34	1.06	1.08	1.42	1.32	1.18	1.51	1.4
MnO	0	0	0	0	0	0	0	0	0	0	0	0	0	0	0	0	0	0	0
MgO	0.43	0.5	0.37	2	0.43	0.3	0.43	0.41	0.45	0.8	0.48	0.53	0.32	0.45	0.46	0.35	0.36	0.49	0.51
CaO	0	0	0	0	0	0	0	0	0	0	0	0	0	0	0	0	0	0	0
Na2O	1.21	1.23	1.27	1	1.18	1.34	1.2	1.14	1.2	1.06	1.16	1.23	1.33	1.26	1.29	1.31	1.34	1.15	1.19
K2O	9.1	9.22	9.07	8.25	9.23	9.08	9.25	9.26	9.19	9.06	9.18	9.16	9.26	9.22	9.07	9.08	9.21	9.09	9.15
Total	95.29	95.24	95.3	94.69	95.3	95.33	95.31	95.31	95.29	95.12	95.28	95.29	95.32	95.31	95.28	95.28	95.31	95.27	95.28
O	11	11	11	11	11	11	11	11	11	11	11	11	11	11	11	11	11	11	11
Si	3.077	3.052	3.051	3.002	3.081	3.066	3.068	3.069	3.088	3.048	3.099	3.068	3.06	3.095	3.093	3.049	3.056	3.072	3.085
Ti	0.014	0.014	0.015	0.014	0.014	0	0.016	0.015	0	0	0	0.015	0.013	0	0	0	0.016	0.017	0.016
Al	2.793	2.786	2.837	2.401	2.794	2.853	2.813	2.811	2.8	2.721	2.778	2.793	2.837	2.802	2.783	2.844	2.828	2.78	2.773
Fe3+	0.075	0.1	0.062	0.386	0.07	0.053	0.061	0.066	0.068	0.153	0.076	0.073	0.058	0.06	0.078	0.073	0.065	0.083	0.078
Fe2+	0	0	0	0	0	0	0	0	0	0	0	0	0	0	0	0	0	0	0
Mn	0	0	0	0	0	0	0	0	0	0	0	0	0	0	0	0	0	0	0
Mg	0.042	0.049	0.036	0.198	0.042	0.029	0.043	0.04	0.044	0.078	0.047	0.052	0.032	0.044	0.046	0.034	0.036	0.048	0.05
Ca	0	0	0	0	0	0	0	0	0	0	0	0	0	0	0	0	0	0	0
Na	0.154	0.158	0.162	0.129	0.151	0.171	0.153	0.146	0.153	0.135	0.147	0.156	0.17	0.16	0.164	0.167	0.171	0.147	0.151
K	0.763	0.775	0.759	0.696	0.774	0.76	0.775	0.777	0.77	0.76	0.769	0.768	0.778	0.773	0.76	0.761	0.773	0.762	0.767
XMg (Fe2+)	1	1	1	1	1	1	1	1	1	1	1	1	1	1	1	1	1	1	1
XMg (Fetot)	0.362	0.327	0.368	0.339	0.375	0.352	0.411	0.377	0.395	0.337	0.381	0.412	0.351	0.425	0.368	0.318	0.356	0.365	0.391
AlIV	0.924	0.948	0.949	0.998	0.919	0.934	0.932	0.931	0.912	0.952	0.901	0.932	0.94	0.905	0.907	0.951	0.944	0.928	0.915
AlVI	1.869	1.837	1.887	1.403	1.875	1.918	1.88	1.879	1.888	1.769	1.878	1.86	1.897	1.897	1.876	1.893	1.884	1.853	1.857

## Sheet: 4-Bt
Table S2b: Representative analysis of biotite in sample 19a-4
N° analysis	6.27 Bt	8.40 Bt	4.6 Bt	11.1 Bt	5.5 Bt	1.3 Bt	1.4 Bt	1.5 Bt	8.23 Bt	9.7 Bt	9.11 Bt	9.14 Bt	9.15 Bt	9.19 Bt	9.20 Bt	9.22 Bt	9.26 Bt	7.1 Bt	7.2 Bt	7.4 Bt	7.5 Bt
Position	Sp	Sp-1	Sp-1	Sp	Sp	Sp-1	Sp-1	Sp	Sp-1	Sp	Sp	Sp-1	Sp-1	Sp-1	Sp	Sp-1	Sp-1	Sp-1	Sp-1	Sp	Sp
SiO2	35.43	35.54	35.83	33.85	35.19	35.68	35.84	35.72	25.69	35.75	35.5	35.1	35.49	35.28	35.63	35.79	35.75	35.6	35.19	35.39	36.02
TiO2	1.62	1.84	1.44	1.21	1.89	1.73	1.58	1.58	0.35	1.6	1.48	1.56	1.75	0.94	1.32	1.6	1.68	1.2	1.13	1.65	1.38
Al2O3	19.54	19.4	20.07	19.71	19.08	19.49	19.36	19.63	21.69	19.35	19.04	19.31	19.16	19.54	19.23	19.8	19.78	19.29	18.83	19.73	19.99
FeO	23.59	23.57	21.82	26.2	24.46	23.38	23.46	23.04	38.36	23.73	24.4	25.66	24.12	24.3	23.84	23.19	23.02	24.12	24.99	23.64	22.68
MnO	0	0	0	0	0	0	0	0	0	0	0	0	0	0	0	0	0	0	0	0	0
MgO	7.32	7.04	8.37	7.56	7.16	7.35	7.28	7.26	5.09	7.16	7.23	6.04	7.06	7.45	7.46	7.15	7.22	7.39	7.36	7.1	7.3
CaO	0	0	0	0	0	0	0	0	0	0	0	0	0	0	0	0	0	0	0	0	0
Na2O	0.43	0.38	0.44	0.35	0.31	0.35	0.33	0.46	0	0.34	0.42	0.37	0.34	0.33	0.35	0.36	0.35	0.27	0	0.3	0.4
K2O	8.2	8.38	8.12	6.97	8.04	8.15	8.28	8.45	1.65	8.21	8.08	8.13	8.23	8.28	8.3	8.24	8.34	8.25	8.64	8.31	8.36
Total	96.13	96.14	96.09	95.85	96.13	96.13	96.13	96.14	92.82	96.14	96.13	96.16	96.14	96.13	96.13	96.13	96.13	96.12	96.14	96.13	96.12
O	11	11	11	11	11	11	11	11	11	11	11	11	11	11	11	11	11	11	11	11	11
Si	2.75	2.76	2.75	2.6	2.73	2.76	2.78	2.77	1.97	2.77	2.75	2.75	2.76	2.73	2.76	2.77	2.77	2.76	2.73	2.75	2.79
Ti	0.09	0.11	0.08	0.07	0.11	0.1	0.09	0.09	0.02	0.09	0.09	0.09	0.1	0.05	0.08	0.09	0.1	0.07	0.07	0.1	0.08
Al	1.78	1.78	1.81	1.78	1.74	1.78	1.77	1.8	1.96	1.77	1.74	1.78	1.75	1.78	1.76	1.81	1.81	1.76	1.72	1.8	1.82
Fe3+	0	0	0	0.14	0	0	0	0	1.89	0	0	0	0	0	0	0	0	0	0	0	0
Fe2+	1.53	1.53	1.4	1.54	1.59	1.51	1.52	1.5	0.57	1.54	1.58	1.68	1.57	1.57	1.54	1.5	1.49	1.56	1.62	1.53	1.47
Mn	0	0	0	0	0	0	0	0	0	0	0	0	0	0	0	0	0	0	0	0	0
Mg	0.85	0.82	0.96	0.87	0.83	0.85	0.84	0.84	0.58	0.83	0.84	0.7	0.82	0.86	0.86	0.83	0.83	0.85	0.85	0.82	0.84
Ca	0	0	0	0	0	0	0	0	0	0	0	0	0	0	0	0	0	0	0	0	0
Na	0.06	0.06	0.07	0.05	0.05	0.05	0.05	0.07	0	0.05	0.06	0.06	0.05	0.05	0.05	0.05	0.05	0.04	0	0.05	0.06
K	0.81	0.83	0.79	0.68	0.8	0.8	0.82	0.84	0.16	0.81	0.8	0.81	0.82	0.82	0.82	0.81	0.82	0.82	0.86	0.82	0.82
XMg (Fe2+)	0.36	0.35	0.41	0.36	0.34	0.36	0.36	0.36	0.5	0.35	0.35	0.3	0.34	0.35	0.36	0.36	0.36	0.35	0.34	0.35	0.37
XMg (Fetot)	0.36	0.35	0.41	0.34	0.34	0.36	0.36	0.36	0.19	0.35	0.35	0.3	0.34	0.35	0.36	0.36	0.36	0.35	0.34	0.35	0.37
AlIV	1.25	1.24	1.25	1.4	1.27	1.24	1.22	1.23	1.96	1.23	1.25	1.25	1.24	1.27	1.24	1.23	1.23	1.24	1.27	1.26	1.21
AlVI	0.53	0.54	0.56	0.38	0.47	0.54	0.55	0.57	0	0.54	0.5	0.53	0.51	0.51	0.52	0.58	0.58	0.52	0.46	0.55	0.61

## Sheet: 4-Chl
Table S2c: Representative analysis of chlorite in sample 19a-4
N° analysis	6.12 Chl	3.1 Chl	3.2 Chl	11.2 Chl	11.3 Chl	2.11 Chl	8.32 Chl	9.4 Chl	9.18 Chl
Position	post-Sp
SiO2	23.36	23.67	23.86	24.01	23.57	23.71	22.58	24.14	24.54
TiO2	0	0	0	0	0	0	0	0	0
Al2O3	23.4	23.02	22.88	22.95	22.89	23.33	24	22.44	21.92
FeO	34.03	31.97	31.68	32.04	32.31	33.62	36.22	31.72	31.94
MnO	0	0	0	0	0	0	0	0	0
MgO	8.21	10.21	10.44	9.88	10.11	8.35	6.34	10.55	10.48
CaO	0	0	0	0	0	0	0	0	0
Na2O	0	0	0	0	0	0	0	0	0
K2O	0	0	0	0	0	0	0	0	0
Total	89.01	88.87	88.86	88.89	88.89	89	89.14	88.86	88.88
O	28	28	28	28	28	28	28	28	28
Si	5.1	5.1	5.14	5.19	5.09	5.17	4.98	5.2	5.29
Ti	0	0	0	0	0	0	0	0	0
Al	6.02	5.85	5.81	5.84	5.82	5.99	6.24	5.7	5.57
Fe3+	0	0	0	0	0	0	0	0	0
Fe2+	6.21	5.77	5.7	5.79	5.83	6.13	6.69	5.71	5.76
Mn	0	0	0	0	0	0	0	0	0
Mg	2.67	3.28	3.35	3.18	3.25	2.71	2.09	3.39	3.37
Ca	0	0	0	0	0	0	0	0	0
Na	0	0	0	0	0	0	0	0	0
K	0	0	0	0	0	0	0	0	0
XMg (Fe2+)	0.301	0.363	0.37	0.355	0.358	0.307	0.238	0.372	0.369
XMg (Fetot)	0.301	0.363	0.37	0.355	0.358	0.307	0.238	0.372	0.369

## Sheet: 4-Grt
Table S2d: Representative analysis of garnet in sample 19a-4
N° analysis	7.14 Grt	6.1 Grt	6.2 Grt	6.3 Grt	6.4 Grt	6.5 Grt	6.6 Grt	6.7 Grt	6.8 Grt	6.9 Grt	6.10 Grt	6.11 Grt	8.1 Grt	8.2 Grt	8.3 Grt	8.4 Grt	8.5 Grt	8.6 Grt	8.7 Grt	8.8 Grt	8.9 Grt	8.10 Grt	8.11 Grt	8.12 Grt	8.13 Grt	8.14 Grt	8.15 Grt	8.16 Grt	8.17 Grt	8.18 Grt
Position	rim	rim	rim	core	core	core	core	core	core	core	rim	rim	rim	core	core	core	core	core	core	core	core	core	core	core	core	core	core	core	rim	rim
SiO2	36.67	36.38	36.92	37.06	36.74	37.55	36.53	37.02	36.84	36.68	36.65	37.13	36.89	36.86	37.31	36.91	37.07	36.96	36.94	37.34	36.83	36.92	36.69	37.28	36.85	37.08	36.87	36.9	36.98	36.75
TiO2	0	0	0	0	0	0	0	0	0	0	0	0	0	0	0	0	0	0	0	0	0	0	0	0	0	0	0	0	0	0
Al2O3	20.8	20.45	20.87	20.54	20.81	21.07	20.73	20.88	20.88	20.76	20.85	20.86	21.02	21.32	21.05	20.75	21.16	20.79	20.83	21.29	21.15	20.98	20.82	21.03	21.05	20.84	20.89	20.9	21.09	20.95
FeO	39.9	40.43	40.68	39.12	38.48	39.3	37.95	38.06	38.31	39.16	40.33	40.99	40.93	39.78	38.68	38.9	38.37	37.72	37.94	37.24	37.24	37.17	37.4	38.19	37.69	37.86	38.08	38.87	40.23	40.47
MnO	1.49	0.9	1.13	1.27	1.53	1.65	1.98	2.04	1.8	1.33	1.19	0.96	1.02	1.5	1.53	1.59	2.31	2.37	2.47	2.58	2.58	2.54	2.3	2.36	2.39	2.09	1.79	1.55	1.26	1.04
MgO	1.62	1.73	1.78	1.6	1.65	1.74	1.51	1.63	1.65	1.66	1.86	1.72	1.67	1.61	1.67	1.54	1.58	1.63	1.56	1.66	1.59	1.52	1.52	1.6	1.7	1.62	1.57	1.59	1.7	1.72
CaO	0.85	0.52	0.49	1.32	1.82	1.63	1.8	1.77	1.76	1.25	0.56	0.45	0.62	1.48	1.95	1.72	1.75	1.86	1.86	1.92	1.85	1.81	2.06	1.88	1.8	2.09	2.01	1.93	0.64	0.65
Na2O	0	0	0	0	0	0	0	0	0	0	0	0	0	0	0	0	0	0	0	0	0	0	0	0	0	0	0	0	0	0
K2O	0	0	0	0	0	0	0	0	0	0	0	0	0	0	0	0	0	0	0	0	0	0	0	0	0	0	0	0	0	0
Total	101.33	100.41	101.87	100.91	101.03	102.94	100.5	101.4	101.24	100.84	101.44	102.11	102.15	102.55	102.19	101.41	102.24	101.33	101.6	102.03	101.24	100.94	100.79	102.34	101.48	101.58	101.21	101.74	101.9	101.58
O	12	12	12	12	12	12	12	12	12	12	12	12	12	12	12	12	12	12	12	12	12	12	12	12	12	12	12	12	12	12
Si	2.96	2.96	2.96	3	2.96	2.97	2.97	2.98	2.97	2.97	2.95	2.97	2.95	2.93	2.97	2.97	2.96	2.97	2.97	2.98	2.96	2.98	2.97	2.97	2.96	2.97	2.97	2.96	2.97	2.96
Ti	0	0	0	0	0	0	0	0	0	0	0	0	0	0	0	0	0	0	0	0	0	0	0	0	0	0	0	0	0	0
Al	1.98	1.96	1.97	1.96	1.98	1.97	1.98	1.98	1.98	1.98	1.98	1.97	1.98	2	1.98	1.97	1.99	1.97	1.97	2	2.01	2	1.98	1.97	1.99	1.97	1.98	1.97	1.99	1.99
Fe3+	0.1	0.11	0.1	0.04	0.09	0.08	0.09	0.07	0.09	0.08	0.12	0.08	0.11	0.13	0.07	0.09	0.1	0.08	0.1	0.04	0.07	0.04	0.08	0.08	0.09	0.08	0.08	0.11	0.08	0.1
Fe2+	2.59	2.65	2.63	2.6	2.5	2.52	2.49	2.49	2.49	2.57	2.6	2.67	2.63	2.52	2.51	2.53	2.46	2.46	2.45	2.44	2.44	2.47	2.45	2.46	2.44	2.46	2.49	2.5	2.62	2.62
Mn	0.1	0.06	0.08	0.09	0.1	0.11	0.14	0.14	0.12	0.09	0.08	0.07	0.07	0.1	0.1	0.11	0.16	0.16	0.17	0.17	0.18	0.17	0.16	0.16	0.16	0.14	0.12	0.11	0.09	0.07
Mg	0.19	0.21	0.21	0.19	0.2	0.21	0.18	0.2	0.2	0.2	0.22	0.21	0.2	0.19	0.2	0.18	0.19	0.2	0.19	0.2	0.19	0.18	0.18	0.19	0.2	0.19	0.19	0.19	0.2	0.21
Ca	0.07	0.05	0.04	0.11	0.16	0.14	0.16	0.15	0.15	0.11	0.05	0.04	0.05	0.13	0.17	0.15	0.15	0.16	0.16	0.16	0.16	0.16	0.18	0.16	0.15	0.18	0.17	0.17	0.06	0.06
Na	0	0	0	0	0	0	0	0	0	0	0	0	0	0	0	0	0	0	0	0	0	0	0	0	0	0	0	0	0	0
K	0	0	0	0	0	0	0	0	0	0	0	0	0	0	0	0	0	0	0	0	0	0	0	0	0	0	0	0	0	0
Grossular	0	0	0	0.02	0.01	0	0.01	0.02	0.01	0	0	0	0	0	0.02	0.01	0	0.01	0.01	0.03	0.02	0.03	0.02	0.01	0.01	0.02	0.02	0	0	0
Almandine	0.88	0.89	0.89	0.87	0.85	0.85	0.84	0.84	0.84	0.87	0.88	0.9	0.89	0.86	0.84	0.85	0.83	0.83	0.83	0.82	0.82	0.83	0.83	0.83	0.82	0.83	0.84	0.84	0.88	0.89
Pyrope	0.07	0.07	0.07	0.06	0.07	0.07	0.06	0.07	0.07	0.07	0.08	0.07	0.07	0.07	0.07	0.06	0.06	0.07	0.06	0.07	0.06	0.06	0.06	0.06	0.07	0.07	0.06	0.06	0.07	0.07
Spessartine	0.03	0.02	0.03	0.03	0.04	0.04	0.05	0.05	0.04	0.03	0.03	0.02	0.02	0.03	0.04	0.04	0.05	0.05	0.06	0.06	0.06	0.06	0.05	0.05	0.06	0.05	0.04	0.04	0.03	0.02
Andradite	0.03	0.02	0.01	0.02	0.05	0.04	0.04	0.04	0.04	0.04	0.02	0.01	0.02	0.04	0.04	0.05	0.05	0.04	0.05	0.02	0.04	0.02	0.04	0.04	0.05	0.04	0.04	0.06	0.02	0.02
AlIV	0.04	0.04	0.04	0	0.04	0.03	0.04	0.02	0.03	0.03	0.05	0.03	0.05	0.07	0.03	0.03	0.04	0.03	0.03	0.02	0.04	0.02	0.03	0.03	0.04	0.03	0.03	0.04	0.04	0.04
AlVI	1.94	1.93	1.94	1.96	1.94	1.94	1.95	1.96	1.95	1.95	1.93	1.94	1.94	1.93	1.95	1.94	1.95	1.95	1.94	1.98	1.97	1.98	1.95	1.95	1.95	1.95	1.95	1.93	1.96	1.94
XMg(Fe2+)	0.07	0.07	0.08	0.07	0.07	0.08	0.07	0.07	0.07	0.07	0.08	0.07	0.07	0.07	0.07	0.07	0.07	0.07	0.07	0.08	0.07	0.07	0.07	0.07	0.08	0.07	0.07	0.07	0.07	0.07
XMg(Fetot)	0.07	0.07	0.07	0.07	0.07	0.07	0.07	0.07	0.07	0.07	0.08	0.07	0.07	0.07	0.07	0.07	0.07	0.07	0.07	0.07	0.07	0.07	0.07	0.07	0.07	0.07	0.07	0.07	0.07	0.07
XMg	0.07	0.07	0.07	0.06	0.07	0.07	0.06	0.07	0.07	0.07	0.08	0.07	0.07	0.07	0.07	0.06	0.06	0.07	0.06	0.07	0.06	0.06	0.06	0.06	0.07	0.07	0.06	0.06	0.07	0.07
XFe2+	0.88	0.89	0.89	0.87	0.85	0.85	0.84	0.84	0.84	0.87	0.88	0.9	0.89	0.86	0.84	0.85	0.83	0.83	0.83	0.82	0.82	0.83	0.83	0.83	0.82	0.83	0.84	0.84	0.88	0.89
XCa	0.03	0.02	0.01	0.04	0.05	0.05	0.05	0.05	0.05	0.04	0.02	0.01	0.02	0.04	0.06	0.05	0.05	0.05	0.05	0.06	0.05	0.05	0.06	0.05	0.05	0.06	0.06	0.06	0.02	0.02
XMn	0.03	0.02	0.03	0.03	0.04	0.04	0.05	0.05	0.04	0.03	0.03	0.02	0.02	0.03	0.04	0.04	0.05	0.05	0.06	0.06	0.06	0.06	0.05	0.05	0.06	0.05	0.04	0.04	0.03	0.02

## Sheet: 4-Cld
Table S2e: Representative analysis of chloritoid in sample 19a-4
N° analysis	7.13 Cld	6.13 Cld	6.14 Cld	6.15 Cld	6.16 Cld	6.18 Cld	6.23 Cld	6.24 Cld	6.25 Cld	6.26 Cld	8.37 Cld	8.38 Cld	8.41 Cld	4.1 Cld	4.2 Cld	2.2 Cld	2.3 Cld	2.4 Cld	2.5 Cld	2.6 Cld	2.9 Cld	2.10 Cld	5.3 Cld	5.4 Cld	5.6 Cld	8.19 Cld	8.20 Cld	8.26 Cld	8.27 Cld	9.1 Cld	9.2 Cld	9.3 Cld	9.9 Cld	9.10 Cld	9.12 Cld	9.13 Cld
	inGrt	inGrt	inGrt	inGrt	inGrt	inGrt	Cld1	Cld1	Cld2	Cld2	Cld2	Cld2	Cld1	Cld1	Cld1	Cld2	Cld1	Cld1	Cld1	Cld1	Cld2	Cld2	Cld2	Cld2	Cld2	inGrt	inGrt	inGrt	inGrt	Cld2	Cld2	Cld2	Cld1	Cld1	Cld1	Cld1
SiO2	24.34	24.35	24.38	24.21	24.4	24.26	24.44	24.65	24.42	24.29	24.37	24.5	24.31	24.41	24.35	24.31	24.56	24.32	24.28	24.51	24.54	24.2	24.19	24.4	24.25	24.5	24.31	24.24	23.94	24.39	24.42	24.3	24.25	24.43	24.53	24.5
TiO2	0	0	0	0	0	0	0	0	0	0	0	0	0	0	0.36	0	0	0	0	0	0	0	0	0	1.63	0	0	0	0	0	0	0	0	0	0	0
Al2O3	40.25	40.22	40.48	40.61	40.65	40.56	40.66	40.83	40.32	40.54	40.53	40.42	40.46	40.4	40.39	40.34	40.57	40.54	40.37	40.56	40.41	40.43	40.53	40.34	40.11	40.26	40.42	40.35	40.15	40.57	40.44	40.69	40.35	40.59	40.59	40.63
FeO	25.91	25.7	25.8	25.77	25.57	25.9	25.58	25.15	25.91	25.91	25.79	25.98	25.95	25.89	25.64	25.96	25.6	25.8	25.99	25.61	25.76	25.94	25.98	25.99	24.9	25.87	25.81	26.02	26.15	25.73	25.79	25.69	26.13	25.75	25.64	25.61
MnO	0	0	0	0	0	0	0	0	0	0	0	0	0	0	0	0	0	0	0	0	0	0	0	0	0	0	0	0	0.31	0	0	0	0	0	0	0
MgO	2.17	2.37	2.05	2.11	2.11	1.98	2.06	2.11	2.06	1.97	2.03	1.86	1.99	2.02	2.02	2.08	2.01	2.05	2.05	2.06	2.03	2.1	1.99	2	1.89	2.09	2.14	2.07	2.06	2.04	2.07	2.04	1.96	1.98	1.99	2.01
CaO	0	0	0	0	0	0	0	0	0	0	0	0	0	0	0	0	0	0	0	0	0	0	0	0	0	0	0	0	0	0	0	0	0	0	0	0
Na2O	0	0	0	0	0	0	0	0	0	0	0	0	0	0	0	0	0	0	0	0	0	0	0	0	0	0	0	0	0	0	0	0	0	0	0	0
K2O	0	0	0	0	0	0	0	0	0	0	0	0	0	0	0	0	0	0	0	0	0	0	0	0	0	0	0	0	0	0	0	0	0	0	0	0
Total	92.67	92.65	92.72	92.69	92.72	92.7	92.74	92.73	92.71	92.71	92.72	92.75	92.71	92.71	92.76	92.69	92.75	92.71	92.69	92.74	92.74	92.67	92.69	92.72	92.78	92.71	92.69	92.68	92.61	92.73	92.72	92.72	92.69	92.74	92.74	92.74
O	14	14	14	14	14	14	14	14	14	14	14	14	14	14	14	14	14	14	14	14	14	14	14	14	14	14	14	14	14	14	14	14	14	14	14	14
Si	2.01	2.01	2.02	2	2.02	2.01	2.02	2.03	2.02	2.01	2.02	2.03	2.01	2.02	2.02	2.01	2.03	2.01	2.01	2.03	2.03	2	2	2.02	2.01	2.03	2.01	2.01	1.99	2.02	2.02	2.01	2.01	2.02	2.03	2.02
Ti	0	0	0	0	0	0	0	0	0	0	0	0	0	0	0.02	0	0	0	0	0	0	0	0	0	0.1	0	0	0	0	0	0	0	0	0	0	0
Al	3.93	3.92	3.95	3.96	3.96	3.96	3.96	3.97	3.93	3.95	3.95	3.94	3.95	3.94	3.94	3.93	3.95	3.95	3.94	3.95	3.94	3.94	3.95	3.94	3.92	3.93	3.94	3.94	3.92	3.95	3.94	3.96	3.94	3.96	3.96	3.96
Fe3+	0.05	0.06	0.02	0.04	0.01	0.03	0	0	0.03	0.03	0.02	0	0.03	0.02	0	0.04	0	0.03	0.04	0	0	0.05	0.04	0.03	0	0.02	0.04	0.05	0.1	0.01	0.02	0.02	0.04	0	0	0
Fe2+	1.75	1.72	1.76	1.74	1.76	1.76	1.77	1.74	1.77	1.77	1.77	1.8	1.77	1.77	1.77	1.76	1.77	1.76	1.76	1.77	1.78	1.74	1.76	1.77	1.73	1.77	1.75	1.75	1.71	1.77	1.77	1.76	1.77	1.78	1.77	1.77
Mn	0	0	0	0	0	0	0	0	0	0	0	0	0	0	0	0	0	0	0	0	0	0	0	0	0	0	0	0	0.02	0	0	0	0	0	0	0
Mg	0.27	0.29	0.25	0.26	0.26	0.24	0.25	0.26	0.25	0.24	0.25	0.23	0.25	0.25	0.25	0.26	0.25	0.25	0.25	0.25	0.25	0.26	0.25	0.25	0.23	0.26	0.26	0.26	0.25	0.25	0.25	0.25	0.24	0.24	0.24	0.25
Ca	0	0	0	0	0	0	0	0	0	0	0	0	0	0	0	0	0	0	0	0	0	0	0	0	0	0	0	0	0	0	0	0	0	0	0	0
Na	0	0	0	0	0	0	0	0	0	0	0	0	0	0	0	0	0	0	0	0	0	0	0	0	0	0	0	0	0	0	0	0	0	0	0	0
K	0	0	0	0	0	0	0	0	0	0	0	0	0	0	0	0	0	0	0	0	0	0	0	0	0	0	0	0	0	0	0	0	0	0	0	0
XMg (Fe2+)	0.13	0.15	0.13	0.13	0.13	0.12	0.13	0.13	0.13	0.12	0.12	0.11	0.12	0.12	0.12	0.13	0.12	0.13	0.13	0.13	0.12	0.13	0.12	0.12	0.12	0.13	0.13	0.13	0.13	0.12	0.13	0.13	0.12	0.12	0.12	0.12
XMg (Fetot)	0.13	0.14	0.12	0.13	0.13	0.12	0.13	0.13	0.12	0.12	0.12	0.11	0.12	0.12	0.12	0.13	0.12	0.12	0.12	0.13	0.12	0.13	0.12	0.12	0.12	0.13	0.13	0.12	0.12	0.12	0.13	0.12	0.12	0.12	0.12	0.12

## Sheet: 4-St
Table S2f: Representative analysis of staurolite in sample 19a-4
N° analysis	7.12 St	6.17 St	6.19 St	6.20 St	6.21 St	6.22 St	8.35 St	8.36 St	8.39 St	4.3 St	4.4 St	11.4 St	11.5 St	2.1 St	2.7 St	2.8 St	5.1 St	5.2 St	8.21 St	8.22 St	8.24 St	8.25 St	8.28 St	8.29 St	8.30 St	8.31 St
SiO2	27.59	27.23	27.61	27.69	27.86	27.91	27.94	28.41	28.12	27.64	27.85	27.7	28.11	27.72	27.6	27.95	27.79	27.9	26.64	27.46	26.25	27.27	26.88	27.48	27.11	27.51
TiO2	0.36	0.58	0	0.52	0.4	0.35	0.6	0	0.56	0.55	0.53	0.48	0.44	0.36	0.3	0.4	0.51	0.56	0.36	0.39	0	0.38	0	0	0.38	0.48
Al2O3	53.66	53.68	53.33	53.85	53.65	54.1	53.86	54.29	54.22	53.21	53.69	54.27	54.47	53.7	53.99	53.8	53.81	54.62	54.63	54.57	55.62	54.61	54.78	54.4	54.63	53.67
FeO	15.12	14.66	15.32	14.72	14.92	14.42	14.47	14.17	14.01	15.14	14.72	14.4	13.96	14.98	14.82	14.68	14.66	13.77	14.5	13.81	14.76	14.83	14.95	14.76	14.61	15.25
MnO	0	0	0	0	0	0	0	0	0	0	0	0	0	0	0	0	0	0	0	0	0	0	0	0	0	0
ZnO	0	0.44	0.45	0	0	0	0	0	0	0	0	0	0	0	0	0	0	0	0.78	0.81	0.44	0	0	0	0	0
MgO	1.17	1.3	1.17	1.11	1.06	1.11	1.02	1.01	0.98	1.09	1.11	1.04	0.91	1.13	1.17	1.06	1.11	1.03	0.98	0.85	0.83	0.8	1.28	1.25	1.16	0.98
CaO	0	0	0	0	0	0	0	0	0	0	0	0	0	0	0	0	0	0	0	0	0	0	0	0	0	0
Na2O	0	0	0	0	0	0	0	0	0	0.26	0	0	0	0	0	0	0	0	0	0	0	0	0	0	0	0
K2O	0	0	0	0	0	0	0	0	0	0	0	0	0	0	0	0	0	0	0	0	0	0	0	0	0	0
Total	97.89	97.89	97.89	97.89	97.89	97.89	97.9	97.89	97.89	97.89	97.89	97.89	97.89	97.89	97.89	97.89	97.89	97.89	97.89	97.89	97.89	97.89	97.88	97.89	97.89	97.89
O	24	24	24	24	24	24	24	24	24	24	24	24	24	24	24	24	24	24	24	24	24	24	24	24	24	24
Si	3.92	3.87	3.93	3.94	3.96	3.96	3.97	4.03	3.99	3.93	3.96	3.93	3.99	3.94	3.92	3.97	3.95	3.96	3.79	3.91	3.73	3.88	3.81	3.9	3.85	3.92
Ti	0.04	0.06	0	0.06	0.04	0.04	0.06	0	0.06	0.06	0.06	0.05	0.05	0.04	0.03	0.04	0.05	0.06	0.04	0.04	0	0.04	0	0	0.04	0.05
Al	8.99	9	8.95	9.02	8.99	9.05	9.03	9.08	9.08	8.91	9	9.08	9.11	9	9.04	9.01	9.01	9.13	9.16	9.15	9.3	9.15	9.15	9.09	9.13	9.01
Fe3+	0	0	0	0	0	0	0	0	0	0	0	0	0	0	0	0	0	0	0	0	0	0	0	0	0	0
Fe2+	1.8	1.74	1.82	1.75	1.77	1.71	1.72	1.68	1.66	1.8	1.75	1.71	1.66	1.78	1.76	1.75	1.74	1.63	1.72	1.64	1.75	1.76	1.77	1.75	1.73	1.82
Mn	0	0	0	0	0	0	0	0	0	0	0	0	0	0	0	0	0	0	0	0	0	0	0	0	0	0
Zn	0	0.05	0.05	0	0	0	0	0	0	0	0	0	0	0	0	0	0	0	0.08	0.09	0.05	0	0	0	0	0
Mg	0.25	0.28	0.25	0.24	0.23	0.24	0.22	0.21	0.21	0.23	0.24	0.22	0.19	0.24	0.25	0.22	0.24	0.22	0.21	0.18	0.18	0.17	0.27	0.26	0.25	0.21
Ca	0	0	0	0	0	0	0	0	0	0	0	0	0	0	0	0	0	0	0	0	0	0	0	0	0	0
Na	0	0	0	0	0	0	0	0	0	0.07	0	0	0	0	0	0	0	0	0	0	0	0	0	0	0	0
K	0	0	0	0	0	0	0	0	0	0	0	0	0	0	0	0	0	0	0	0	0	0	0	0	0	0
XMg (Fe2+)	0.12	0.14	0.12	0.12	0.11	0.12	0.11	0.11	0.11	0.11	0.12	0.11	0.1	0.12	0.12	0.11	0.12	0.12	0.11	0.1	0.09	0.09	0.13	0.13	0.12	0.1
XMg (Fetot)	0.12	0.14	0.12	0.12	0.11	0.12	0.11	0.11	0.11	0.11	0.12	0.11	0.1	0.12	0.12	0.11	0.12	0.12	0.11	0.1	0.09	0.09	0.13	0.13	0.12	0.1

## Sheet: 4-Ilm
Table S2g: Representative analysis of ilmenite in sample 19a-4
N° analysis	7.10 Ilm	7.11 Ilm	4.5 Ilm	8.33 Ilm	8.35 Ilm	9.5 Ilm
SiO2	0	0	0	0	0	0
TiO2	51.93	51.67	51.87	51.19	51.92	51.32
Al2O3	0	0	0	0	0	0
FeO	47.11	47.49	47.54	45.35	47.21	46.82
MnO	0	0	0	1.4	0.58	0
MgO	0	0	0	0	0	0
CaO	0	0	0	0	0	0
Na2O	0	0	0	0	0	0
K2O	0	0	0	0	0	0
Total	99.04	99.16	99.41	97.94	99.71	98.14
O	3	3	3	3	3	3
Si	0	0	0	0	0	0
Ti	1	0.99	0.99	0.99	0.99	0.99
Al	0	0	0	0	0	0
Fe3+	0.01	0.02	0.02	0.02	0.02	0.01
Fe2+	1	0.99	0.99	0.96	0.98	0.99
Mn	0	0	0	0.03	0.01	0
Mg	0	0	0	0	0	0
Ca	0	0	0	0	0	0
Na	0	0	0	0	0	0
K	0	0	0	0	0	0
Hematite	0	0.01	0.01	0.01	0.01	0.01
Corundum	0	0	0	0	0	0
Eskolaite	0	0	0	0	0	0
Ilmenite	1	0.99	0.99	0.96	0.98	0.99
Geikielite	0	0	0	0	0	0
Mn-Ilmenite	0	0	0	0.03	0.01	0
XMg (Fe2+)	0	0	0	0	0	0
XFe2+	1	1	1	0.97	0.99	1
