# Supplementary figures and images for: Equilibrium and kinetic approaches to understand the occurrence of the uncommon chloritoid + biotite assemblage
Source: Copernicus journal article supplement (doi:10.5194/ejm-35-305-2023), 2023-05-02

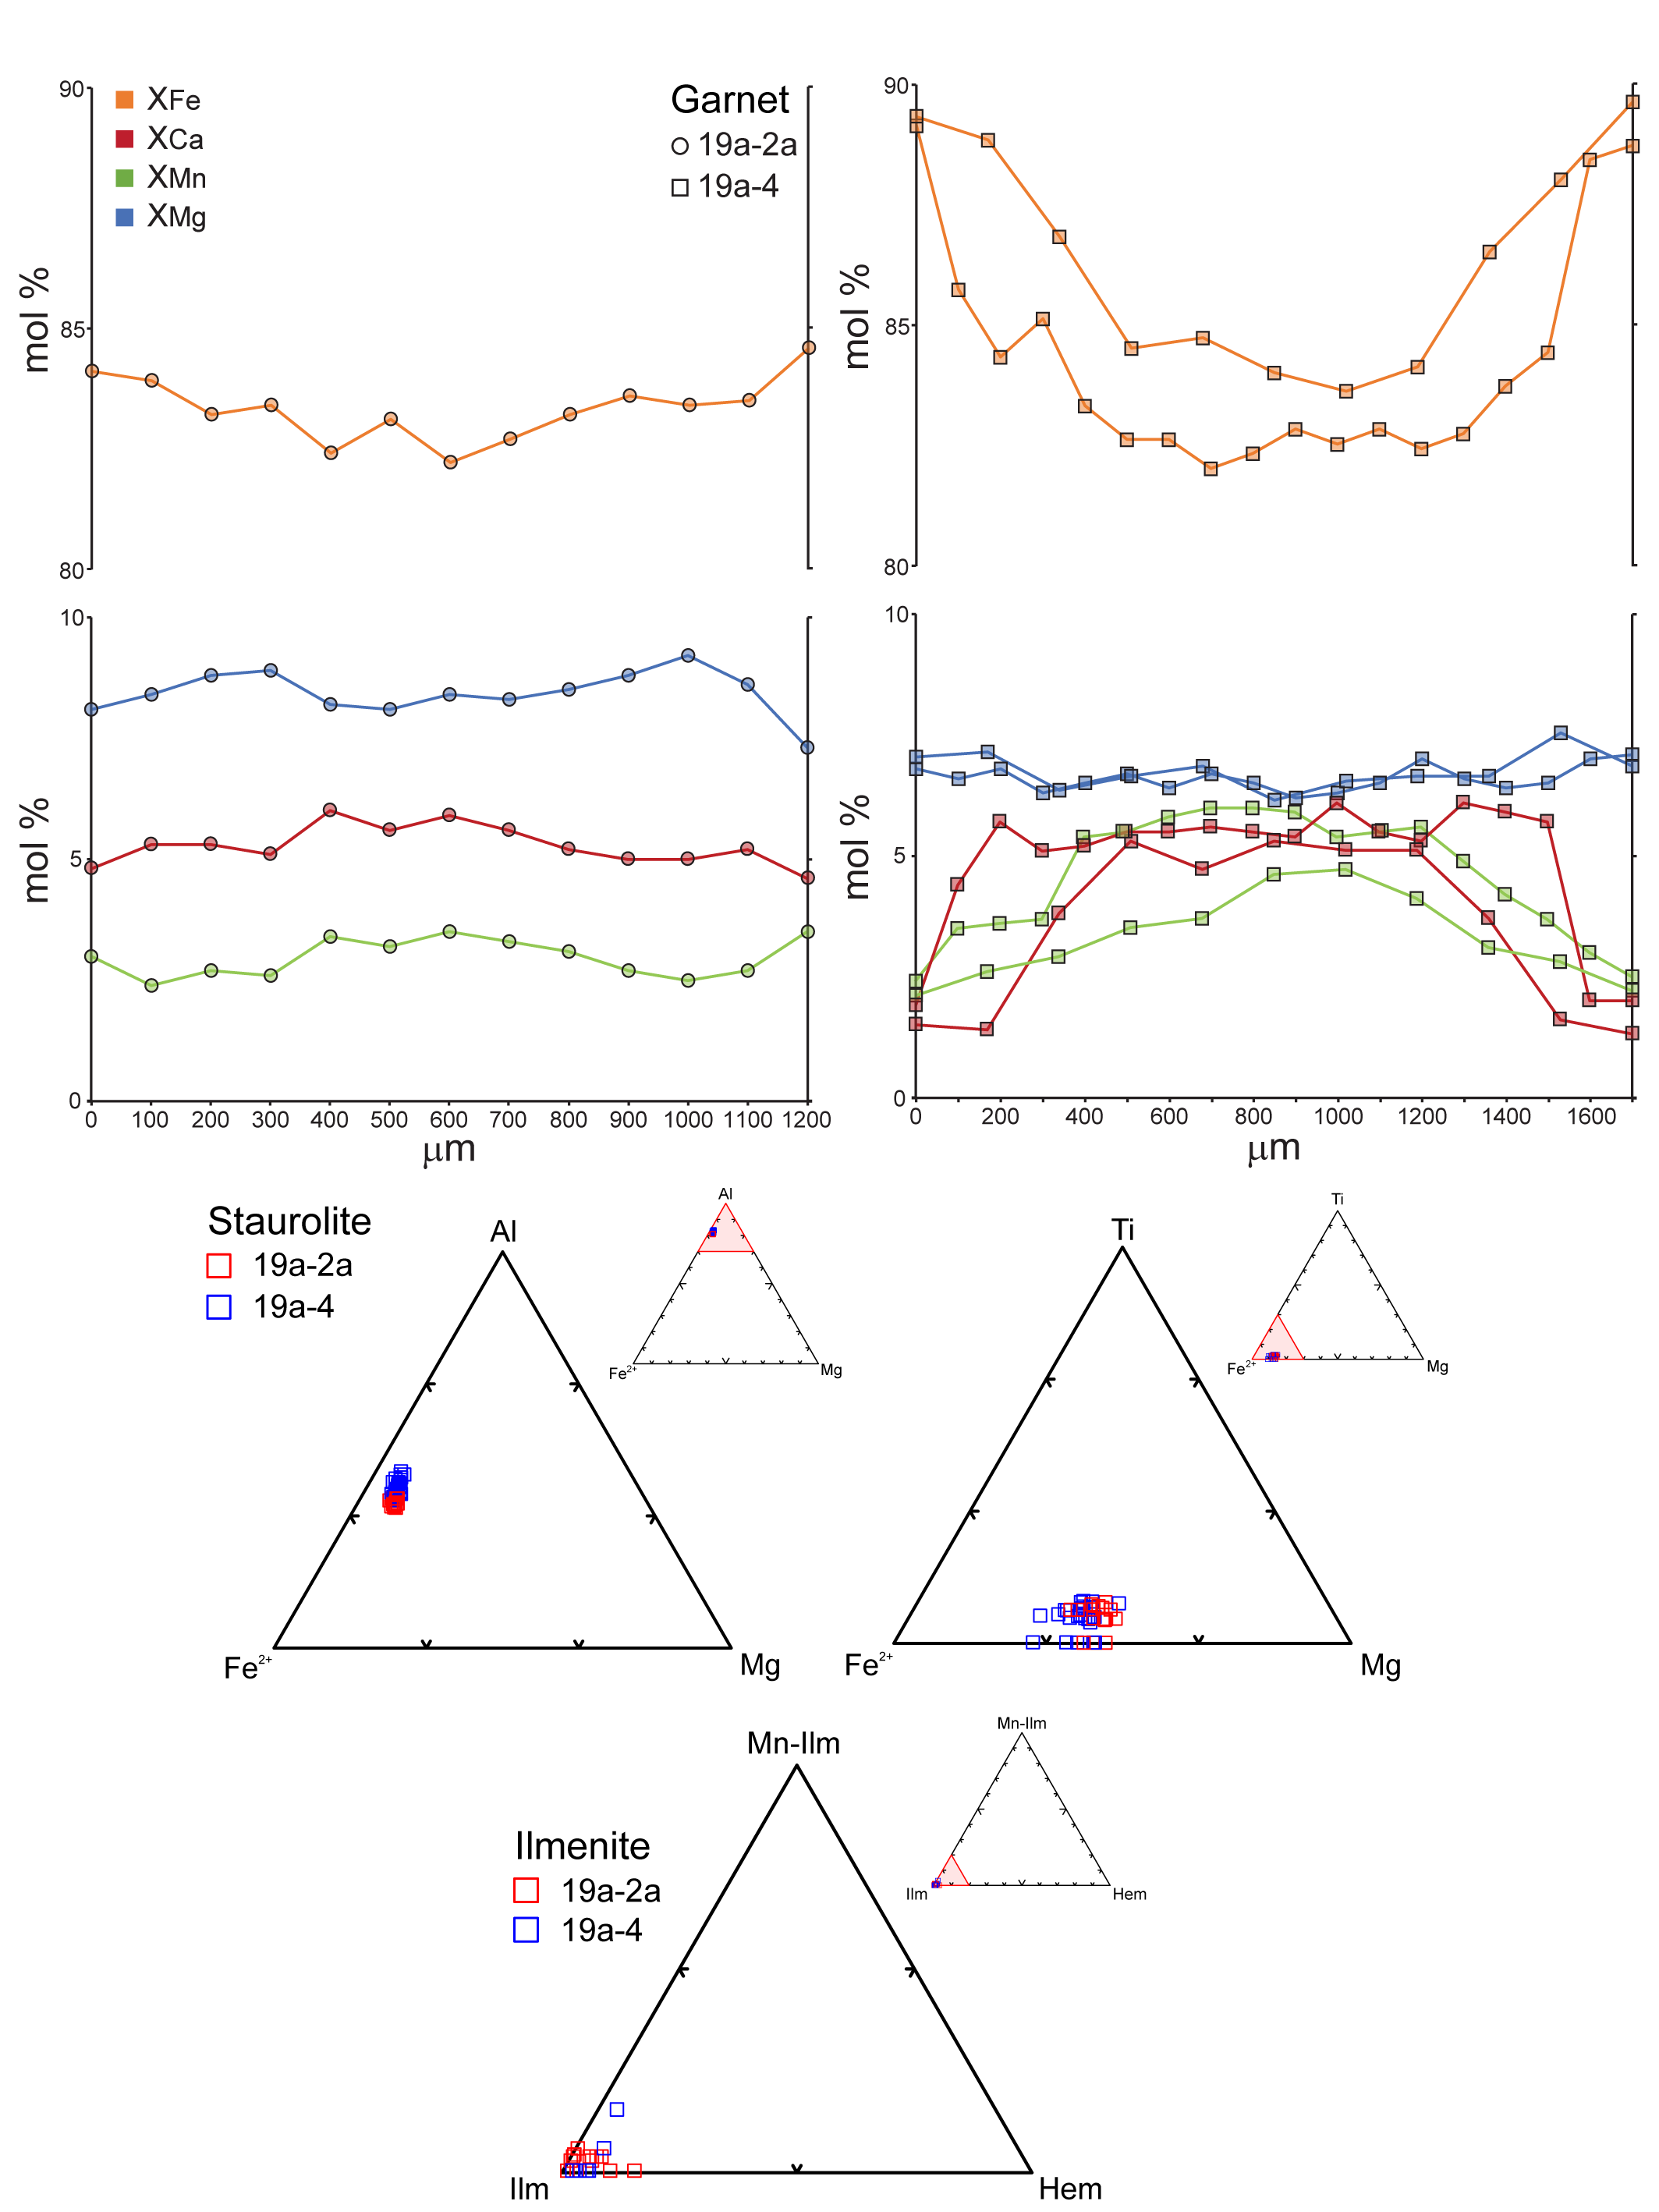

Supplement: Supplementary file 2 [file ejm-35-305-2023-supplement.zip › Supplementary material/Figure S2.png]

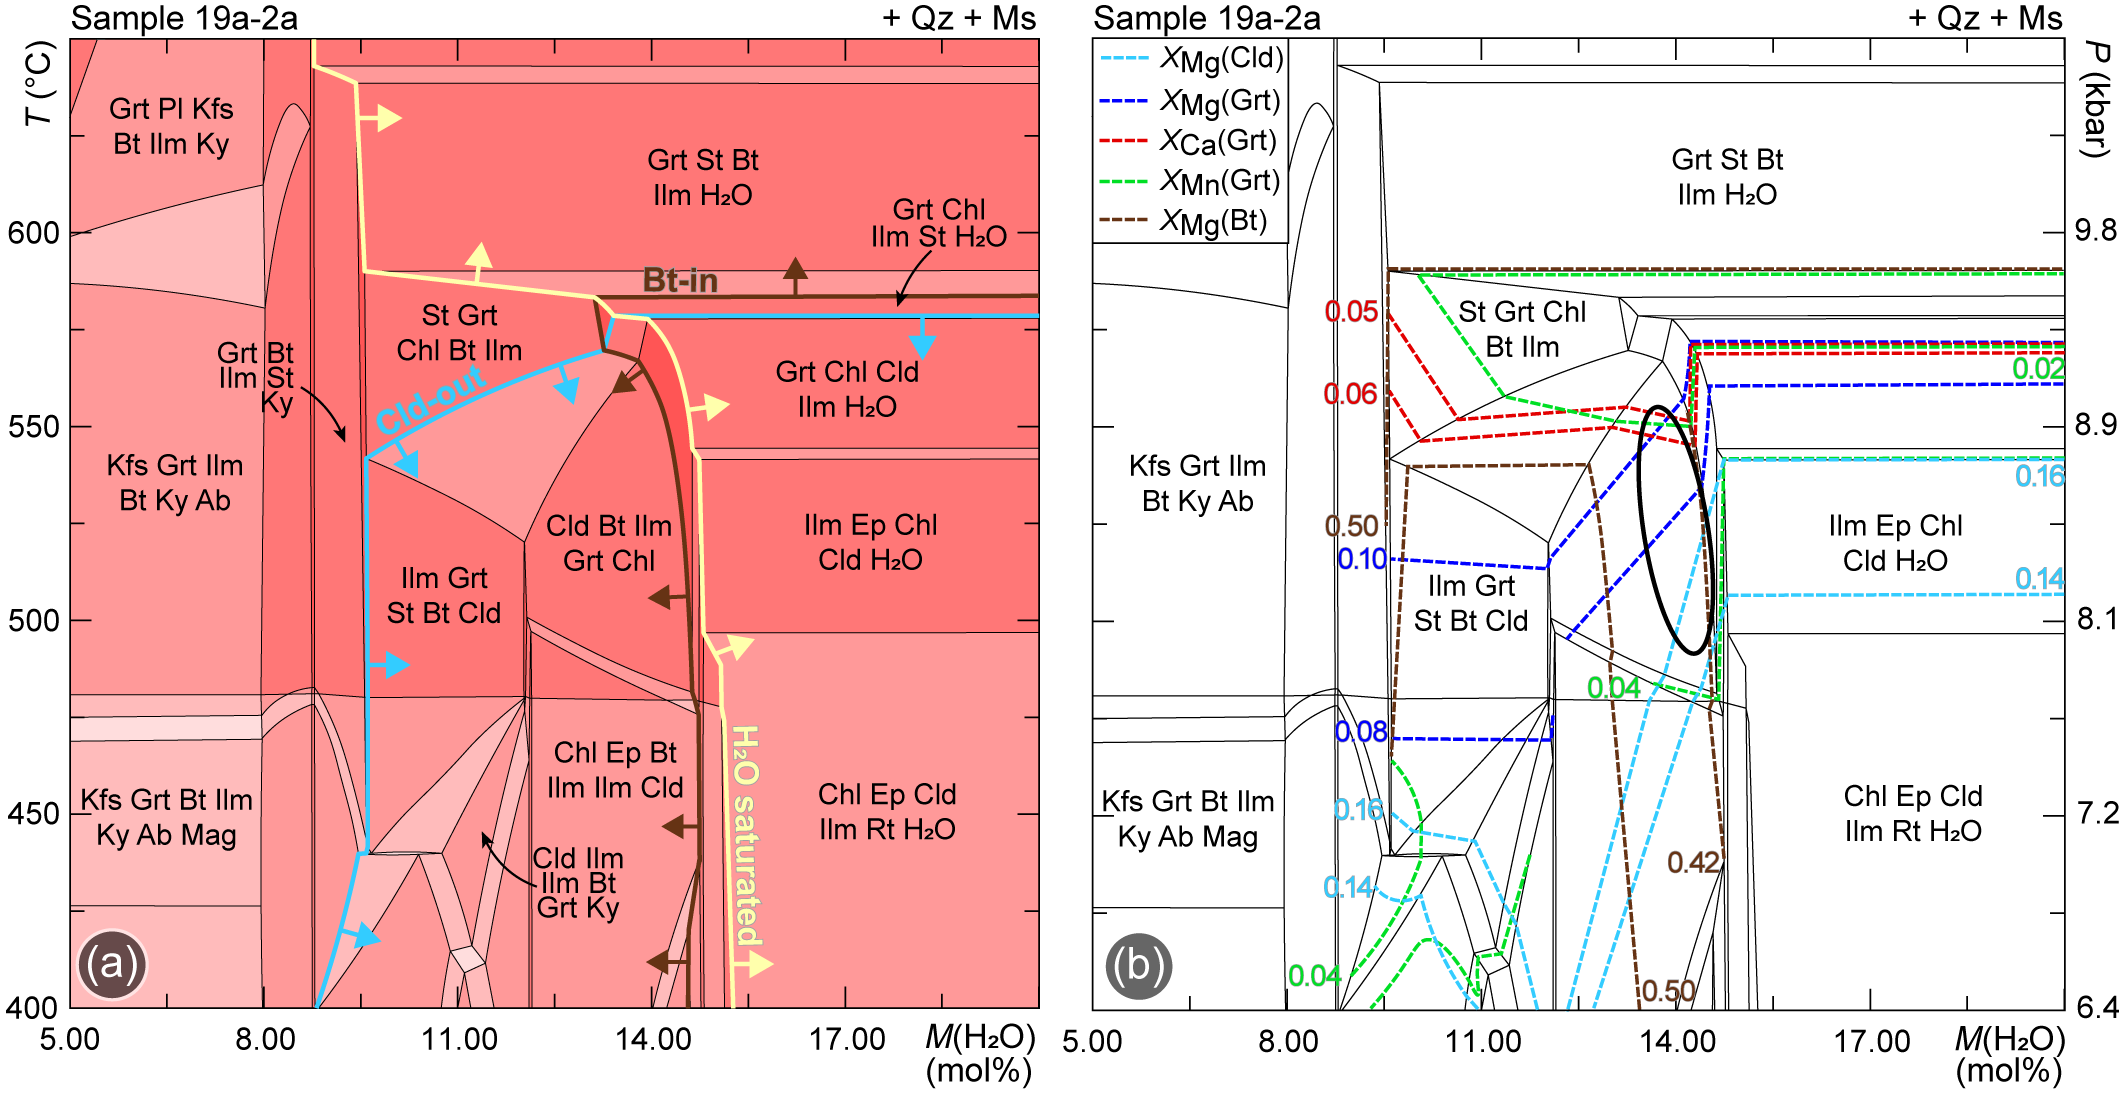

Supplement: Supplementary file 2 [file ejm-35-305-2023-supplement.zip › Supplementary material/Figure S5.png]

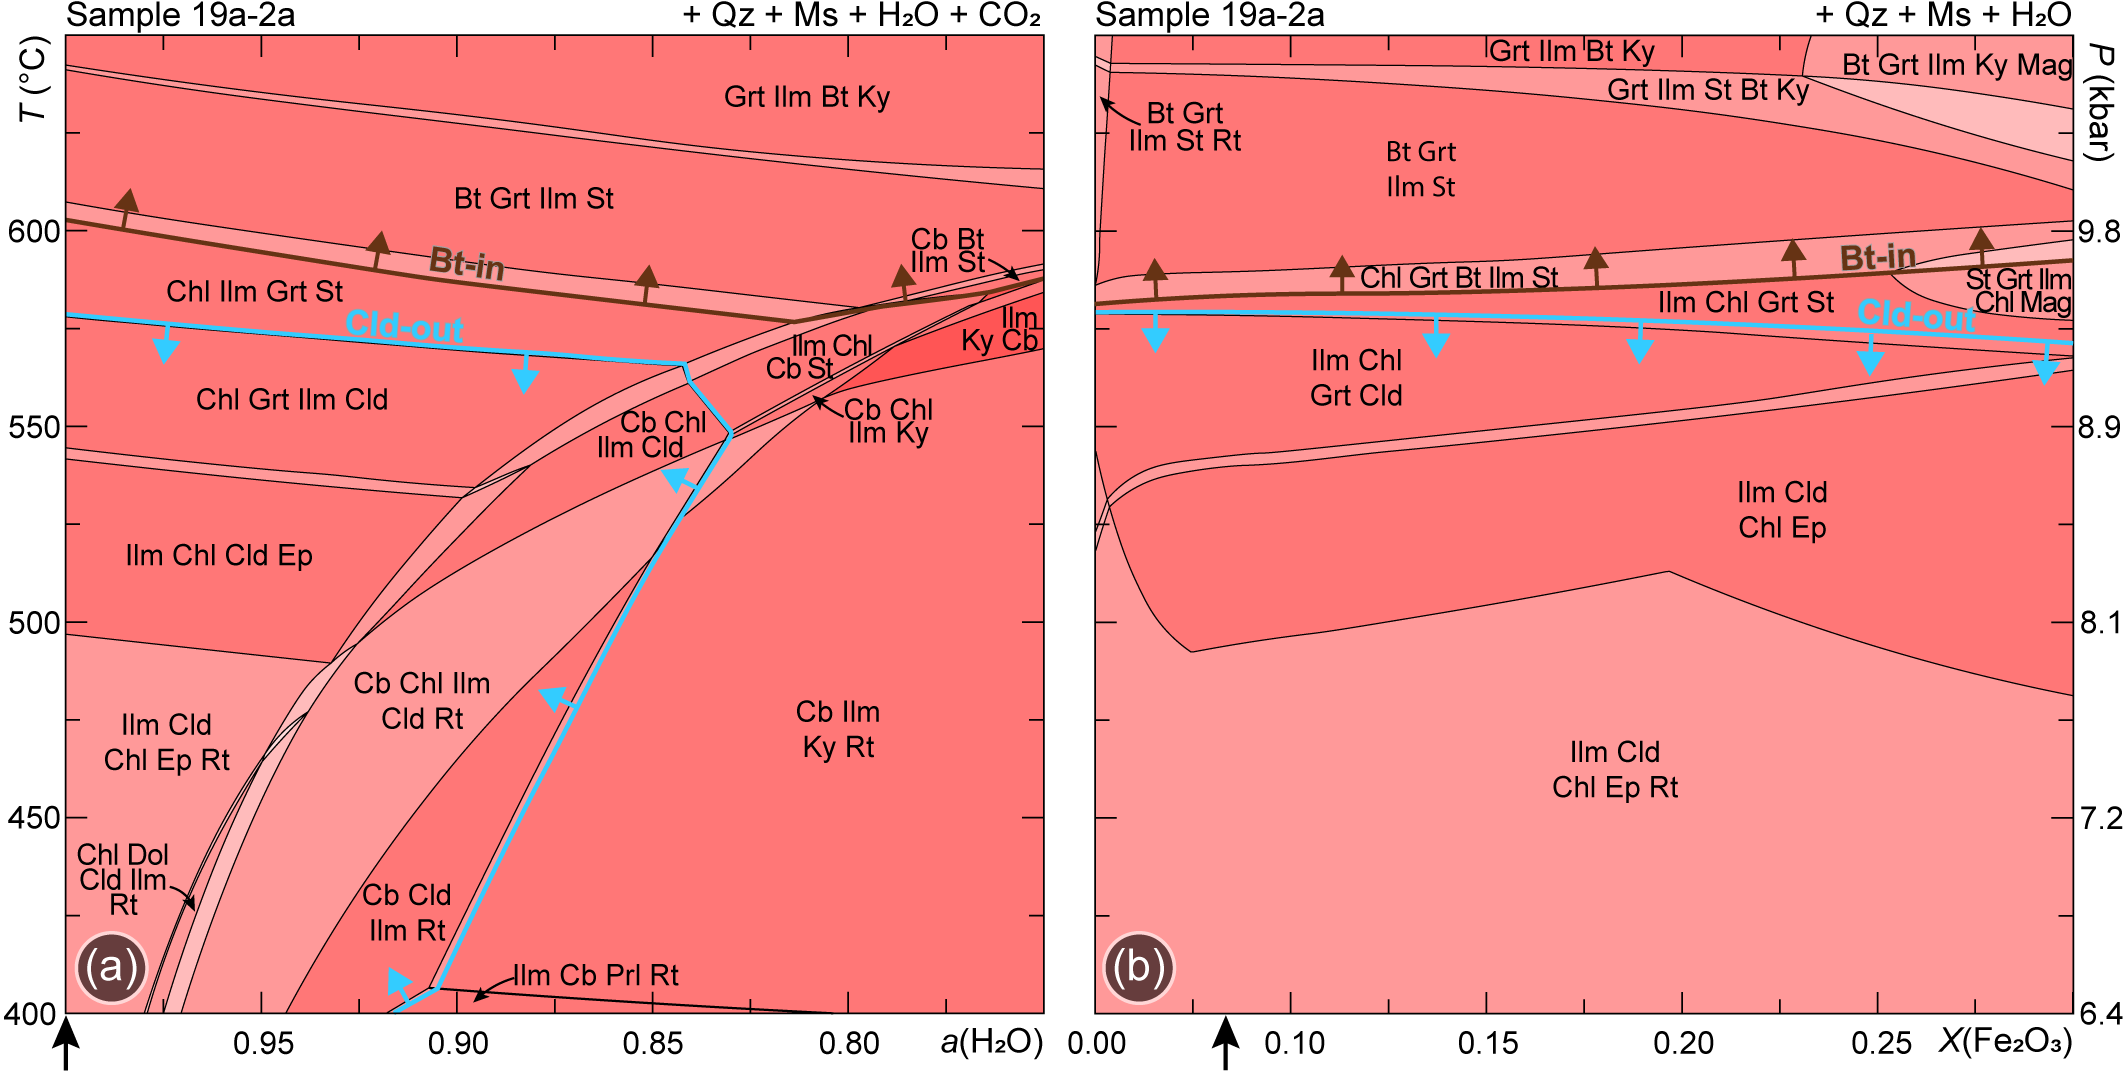

Supplement: Supplementary file 2 [file ejm-35-305-2023-supplement.zip › Supplementary material/Figure S4.png]

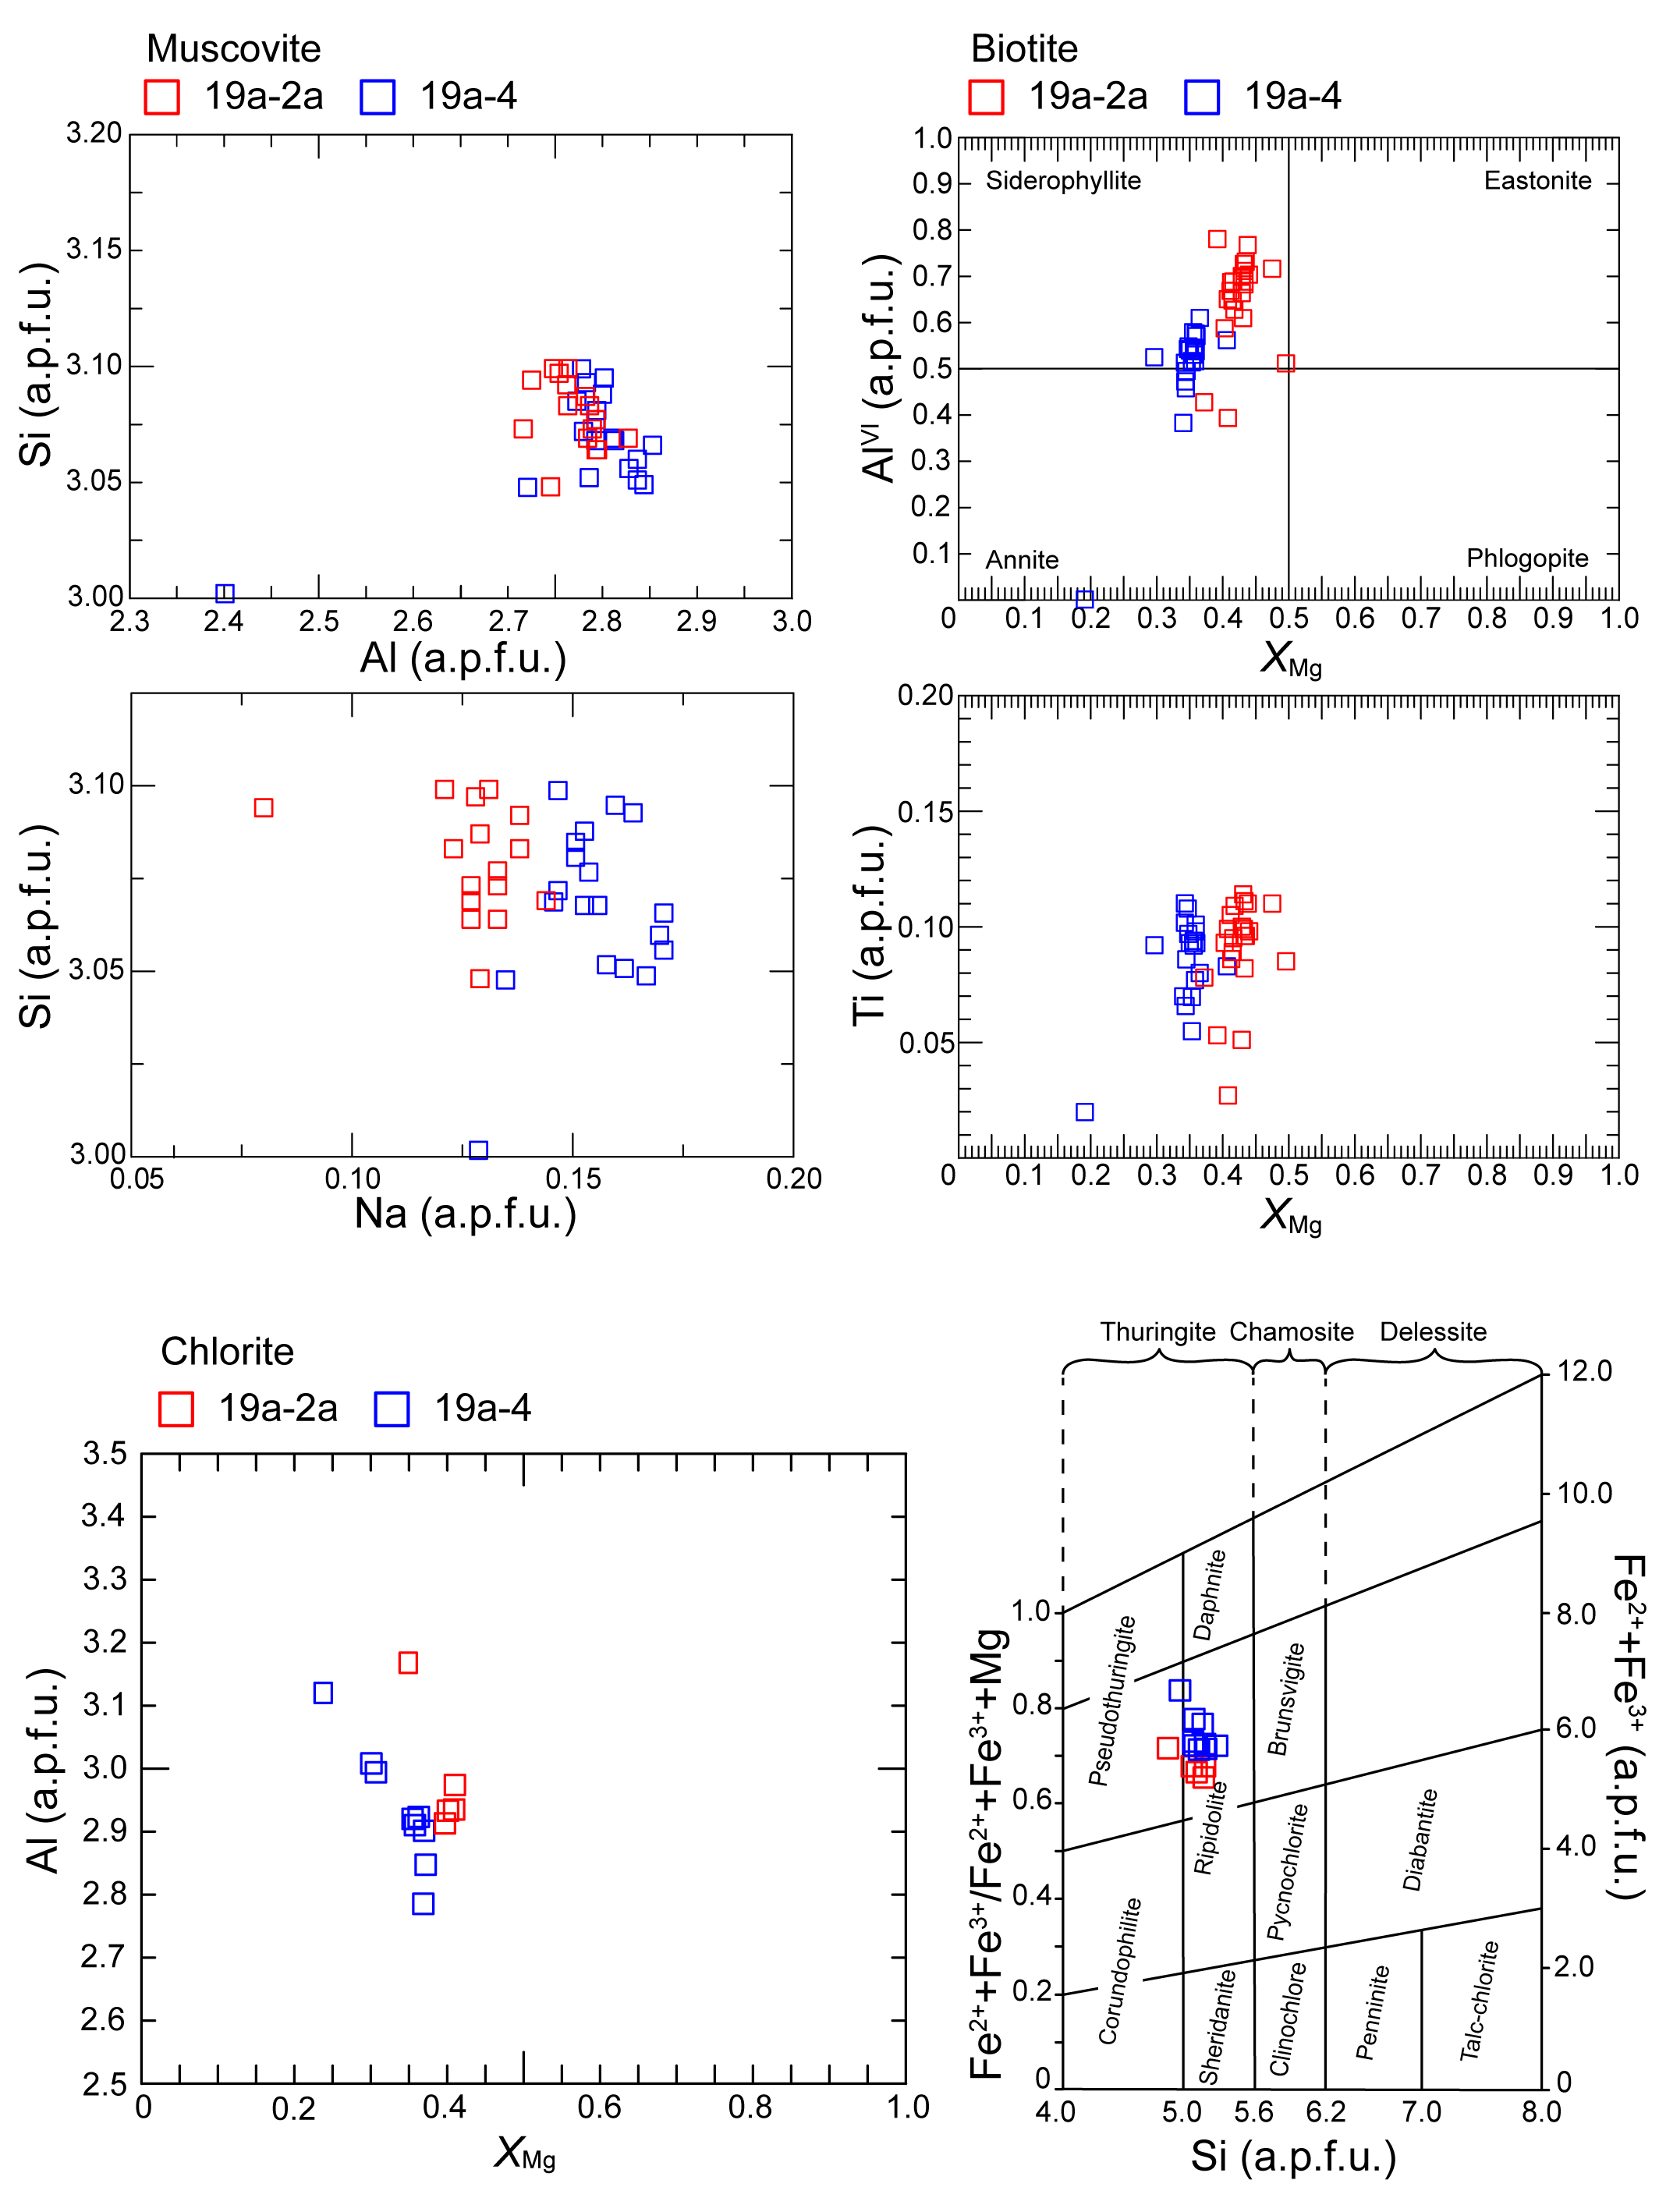

Supplement: Supplementary file 2 [file ejm-35-305-2023-supplement.zip › Supplementary material/Figure S1.png]

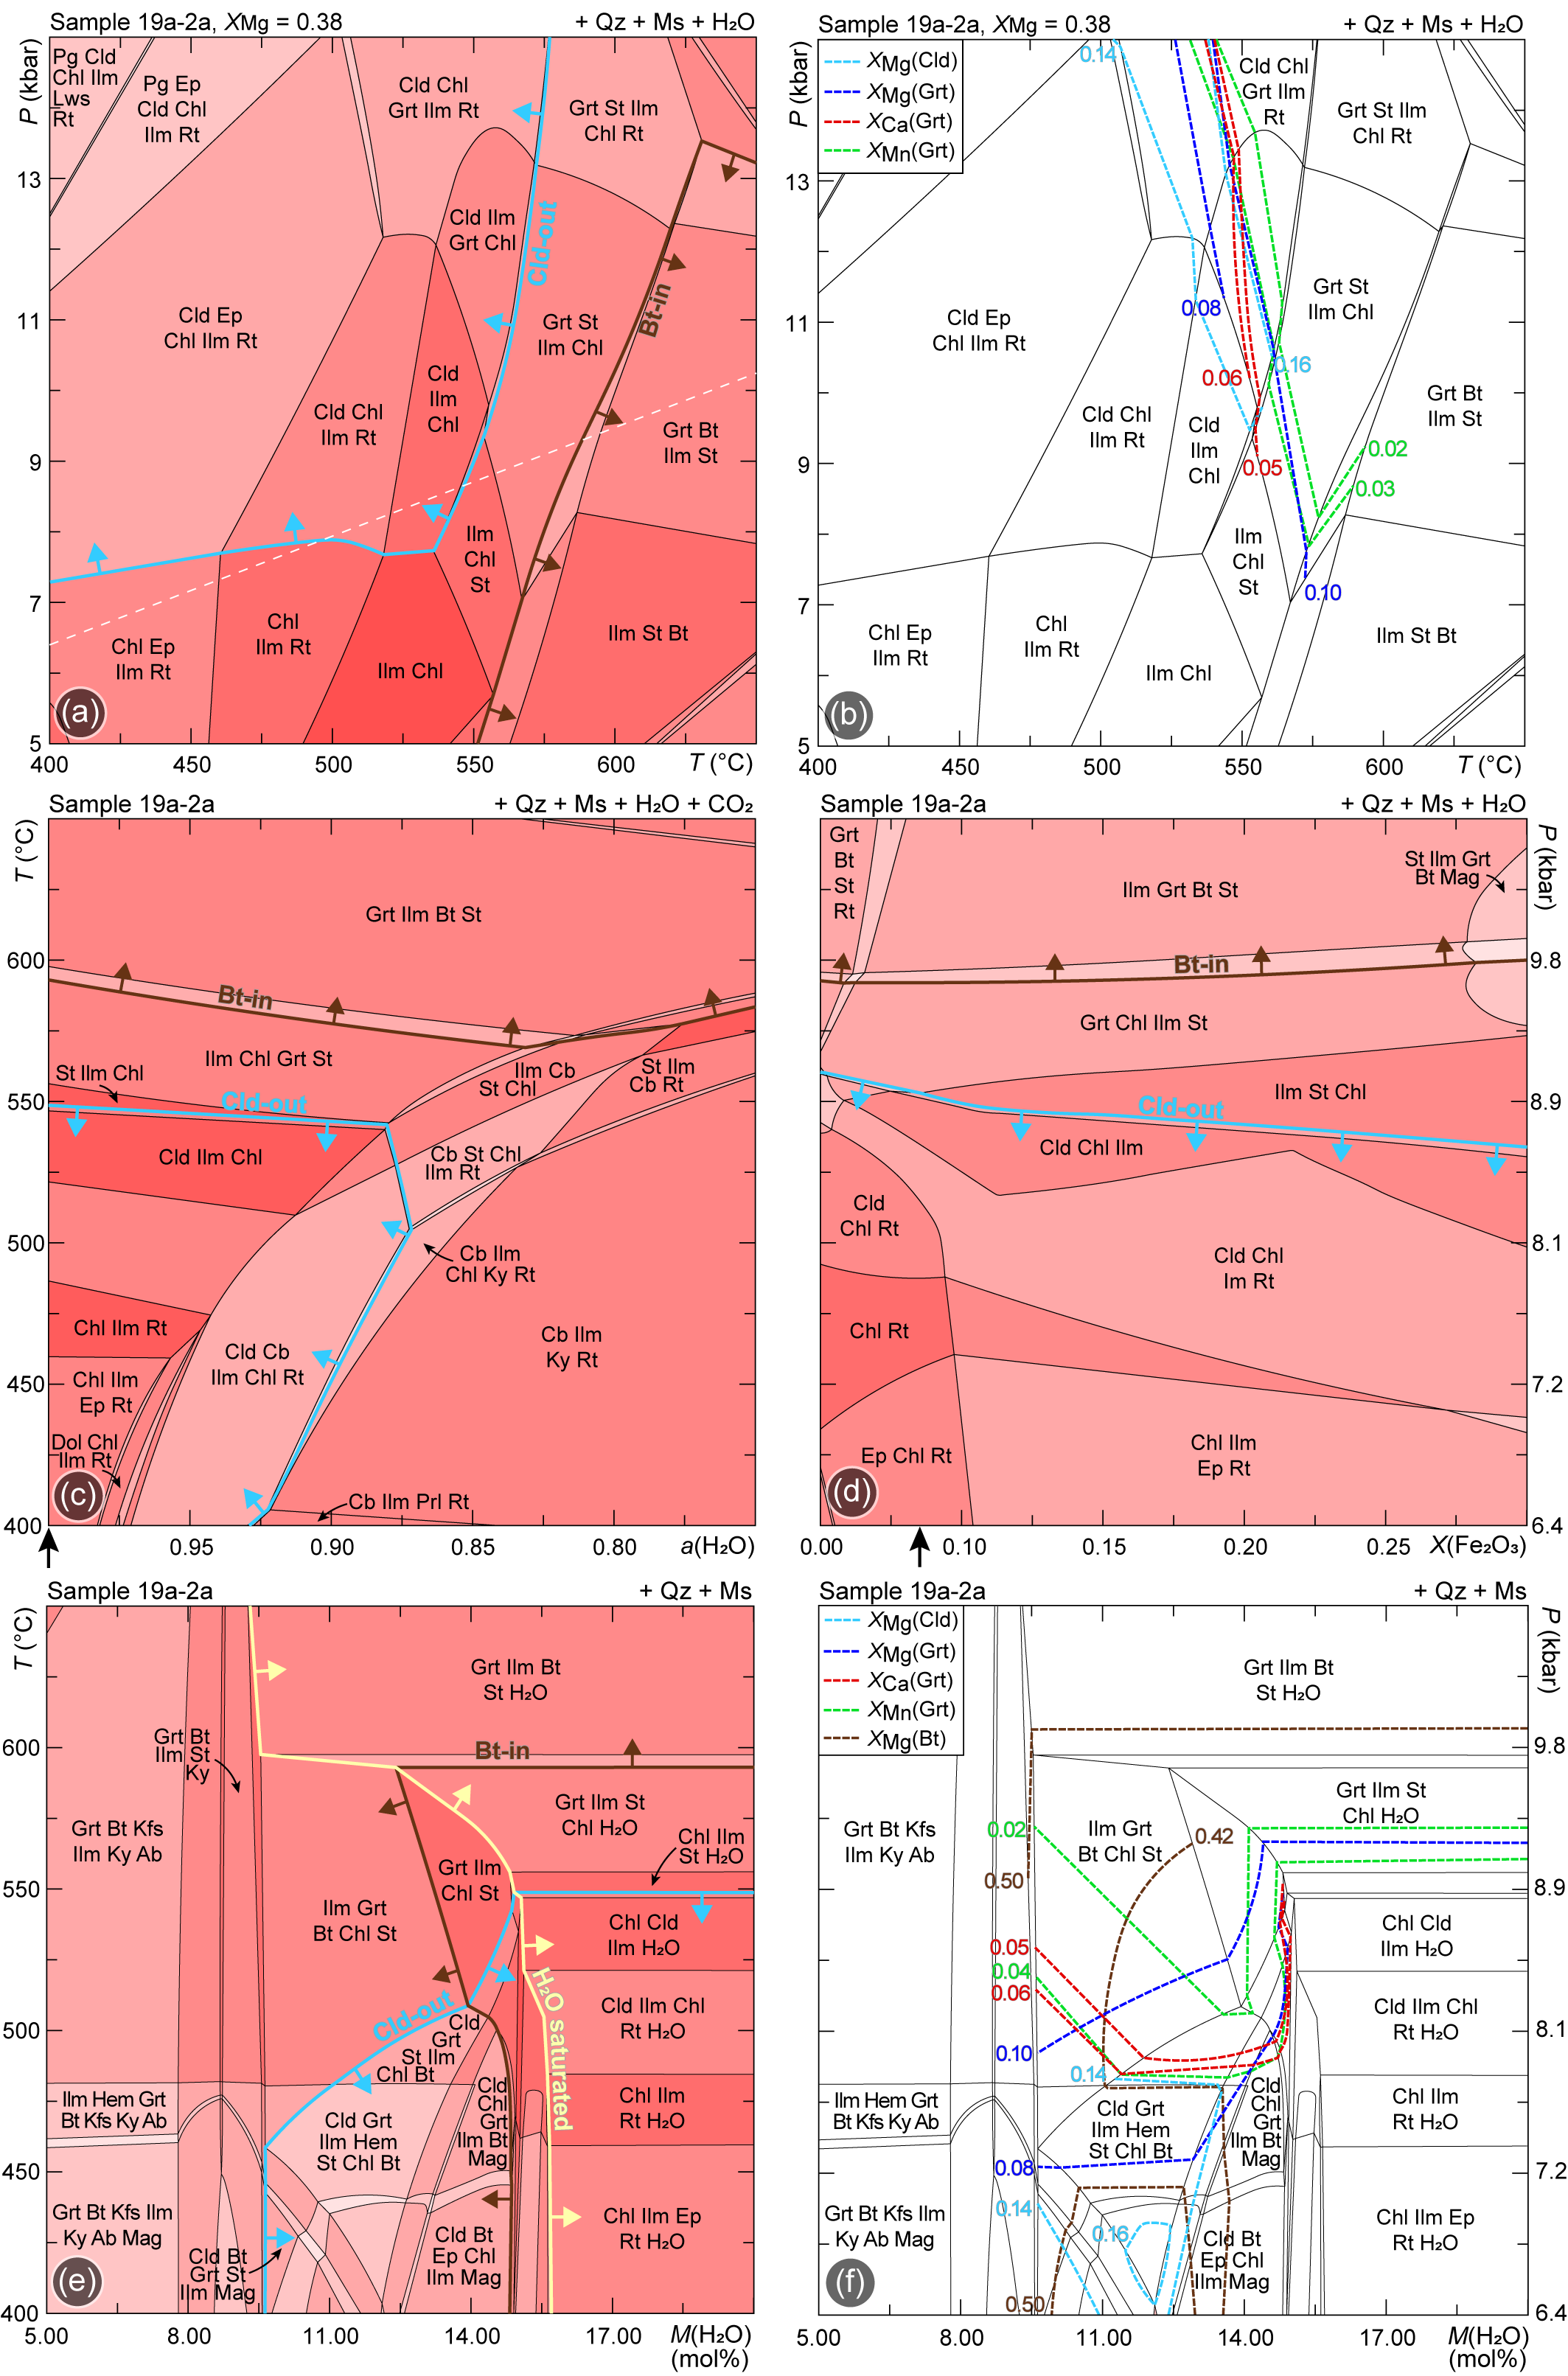

Supplement: Supplementary file 2 [file ejm-35-305-2023-supplement.zip › Supplementary material/Figure S3.png]
